1  
2  
3  
4  
5  
6  
7  
8  
9  
10  
11  
12  
13  
14  
15  
16  
17  
18  
19  
20  
21  
22  
23  
24  
25  
26  
27  
28  
29  
30  
31

## **Onecut factors and Pou2f2 regulate the distribution of V2 interneurons in the mouse developing spinal cord**

Audrey Harris<sup>1</sup>, Gauhar Masgutova<sup>1</sup>, Amandine Collin<sup>1</sup>, Mathilde Toch<sup>1</sup>, Maria Hidalgo-Figueroa<sup>1,4</sup>, Benvenuto Jacob<sup>2</sup>, Lynn M. Corcoran<sup>3</sup>, Cédric Francius<sup>1,5</sup> and Frédéric Clotman<sup>1\*</sup>

<sup>1</sup> Université catholique de Louvain, Institute of Neuroscience, Laboratory of Neural Differentiation, Brussels, Belgium; <sup>2</sup> Université catholique de Louvain, Institute of Neuroscience, System and Cognition division, Brussels, Belgium; <sup>3</sup> The Walter and Eliza Hall Institute, Molecular Immunology Division and Immunology Division, Parkville, Victoria, Australia.

**For correspondence** : frederic.clotman@uclouvain.be

<sup>4</sup> Present address : Neuropsychopharmacology & Psychobiology Research Group, Area of Psychobiology, Department of Psychology, University of Cadiz, Spain; Instituto de Investigación e Innovación en Ciencias Biomédicas de Cádiz (INiBICA), Spain

<sup>5</sup> Present address : PAREXEL International, France

Running title : Spinal interneuron migration

Key words : Embryonic spinal cord, V2 interneurons, OneCut, Pou2f2, neuronal migration, differentiation

32 **Abstract**

33 Acquisition of proper neuronal identity and position is critical for the formation of neural  
34 circuits. In the embryonic spinal cord, cardinal populations of interneurons diversify into  
35 specialized subsets and migrate to defined locations within the spinal parenchyma.  
36 However, the factors that control interneuron diversification and migration remain poorly  
37 characterized. Here, we show that the Onecut transcription factors are necessary for proper  
38 diversification and distribution of the V2 interneurons in the developing spinal cord.  
39 Furthermore, we uncover that these proteins restrict and moderate the expression of spinal  
40 isoforms of *Pou2f2*, a transcription factor known to regulate B-cell differentiation. By gain-  
41 or loss-of-function experiments, we show that *Pou2f2* contribute to regulate the position of  
42 V2 populations in the developing spinal cord. Thus, we uncovered a genetic pathway that  
43 regulates the diversification and the distribution of V2 interneurons during embryonic  
44 development.

45

46

47 **Significance statement**

48 In this study, we identify the Onecut and *Pou2f2* transcription factors as regulators of spinal  
49 interneuron diversification and migration, two events that are critical for proper CNS  
50 development.

51

## 52 **Introduction**

53 Neuronal migration is a critical feature of CNS development. It enables neurons to reach an  
54 adequate location in the nervous parenchyma and to properly integrate into neural circuits.  
55 The mechanisms that regulate neuronal migration have been extensively studied in the  
56 developing brain, particularly for cortical interneurons (INs) (Barber and Pierani, 2016, Guo  
57 and Anton, 2014). In contrast, the factors that control IN migration in the developing spinal  
58 cord remain almost totally unknown.

59 In the embryonic spinal cord, distinct neuronal populations are generated from different  
60 progenitor domains orderly distributed along the dorso-ventral axis of the ventricular zone.  
61 These progenitors produce motor neurons and multiple populations of ventral or dorsal INs  
62 (Lai et al., 2016, Lu et al., 2015). Although spinal IN populations do not organize into columns  
63 along the anteroposterior axis of the spinal cord, they each migrate according to a  
64 stereotyped pattern and settle down at specific focused or diffuse locations in the spinal  
65 parenchyma (Grossmann et al., 2010). Recent studies demonstrated that proper neuronal  
66 distribution is critical for adequate formation of spinal circuits. Indeed, the clustering and  
67 dorso-ventral settling position of motor neuron pools critically pattern sensory input  
68 specificity (Surmeli et al., 2011). Position of dorsal INs along the medio-lateral axis in lamina  
69 V determines their connectivity with sensory afferents (Hilde et al., 2016) while extensor and  
70 flexor premotor INs segregate along the medio-lateral axis of the spinal cord (Tripodi et al.,  
71 2011). Positional distinctions among premotor INs additionally correlate with their output to  
72 different motor columns (Goetz et al., 2015) and differential distribution of V1 IN subsets  
73 constrain patterns of input from sensory and from motor neurons (Bikoff et al., 2016).  
74 Consistently, distinct ventral IN subsets are differentially distributed along the  
75 anteroposterior axis of the spinal cord (Bikoff et al., 2016, Francius et al., 2013, Hayashi et  
76 al., 2018) and integrate into specific local microcircuit modules (Hayashi et al., 2018).  
77 However, the molecular mechanisms that regulate proper distribution of spinal INs remain  
78 elusive.

79 During their migration, cardinal populations of spinal neurons undergo progressive  
80 diversification into distinct subsets that exert specific functions in spinal circuits (Catela et  
81 al., 2015, Lai et al., 2016, Lu et al., 2015). For example, V2 INs divide into major V2a and V2b  
82 and minor V2c and V2d populations characterized by the expression of Chx10, Gata3, Sox1  
83 and Shox2, respectively. V2a and V2d are excitatory neurons that participate in left-right

84 alternation at high speed and contribute to rhythmic activation of locomotor circuits,  
85 respectively (Crone et al., 2008, Dougherty and Kiehn, 2010, Dougherty et al., 2013). V2b  
86 cells are inhibitory INs that participate in alternation of flexor vs extensor muscle contraction  
87 (Britz et al., 2015). As observed for V1 INs (Bikoff et al., 2016), V2 cells further diversify into  
88 more discrete subpopulations differentially distributed along the anteroposterior axis of the  
89 spinal cord (Francius et al., 2013, Hayashi et al., 2018). However, specific functions of these  
90 IN subsets have not been investigated yet, and the mechanisms that govern their production  
91 remain currently unknown.

92 Recently, we identified Onecut (OC) transcription factors as regulators of neuronal  
93 diversification (Kabayiza et al., 2017, Roy et al., 2012, Francius and Clotman, 2014) and of  
94 dorsal IN migration (Kabayiza et al., 2017) in the developing spinal cord. OC factors, namely  
95 Hepatocyte Nuclear Factor-6 (HNF-6, or OC-1), OC-2 and OC-3, are transcriptional activators  
96 present in the digestive tract and in the CNS during embryonic development (Jacquemin et  
97 al., 1999, Lemaigre et al., 1996, Jacquemin et al., 2003b, Landry et al., 1997, Vanhorenbeeck  
98 et al., 2002). In neural tissue, they regulate production (Espana and Clotman, 2012a),  
99 diversification (Roy et al., 2012, Francius and Clotman, 2014, Kabayiza et al., 2017),  
100 distribution (Audouard et al., 2013, Espana and Clotman, 2012a, Espana and Clotman,  
101 2012b, Kabayiza et al., 2017) and maintenance (Espana and Clotman, 2012a, Espana and  
102 Clotman, 2012b, Stam et al., 2012) of specific neuronal populations, as well as the formation  
103 of neuromuscular junctions (Audouard et al., 2012). Here, we demonstrate that OC factors  
104 regulate the diversification and the distribution of V2 INs during spinal cord development.  
105 Analyses of OC-deficient embryos showed defective production of specific subpopulations of  
106 V2a INs, as well as abnormal distribution of V2a and V2b cells in the developing spinal cord.  
107 Furthermore, we uncovered that OC proteins act upstream of specific spinal isoforms of  
108 Pou2f2, a POU family transcription factor. Using gain- or loss-of-function experiments, we  
109 demonstrated that, as observed for OC factors, Pou2f2 regulates the distribution of V2 INs in  
110 the developing spinal cord. Thus, we uncovered a genetic pathway that regulates the  
111 diversification and the distribution of V2 INs during embryonic development.

## 112 **Results**

113

### 114 **OC factors are present in multiple subsets of spinal V2 INs**

115 In the developing spinal cord, OC factors contribute to diversification, migration and  
116 maintenance of different neuronal populations (Kabayiza et al., 2017, Roy et al., 2012, Stam  
117 et al., 2012). To study V2 IN diversification, we previously established a repertoire of  
118 markers that divide embryonic V2 cells into multiple subpopulations (Francius et al., 2013).  
119 Although OC factors have been detected in V2 INs (Francius and Clotman, 2010, Francius et  
120 al., 2013) and are similarly distributed at distinct antero-posterior levels (Francius et al.,  
121 2013), their production in V2 subsets has not been investigated yet. Therefore, we first  
122 determined the presence of each OC in these V2 subpopulations at e12.5.

123 V2a INs include neuronal subsets characterized by the presence of *Shox2*, *MafA*, *cMaf*,  
124 *Bhlhb5* or *Prdm8* (Francius et al., 2013). Only *Hnf6* was detected in few *Shox2+* V2a cells  
125 (Figure 1A-C"; Table 1). In contrast, the 3 OC proteins were detected in *MafA+* and *cMaf+*  
126 V2a subpopulations (Figure 1D-I"; Table 1), but not in *Bhlhb5+* or *Prdm8+* cells (Table 1; data  
127 not shown). V2b INs include similar subsets except for *Shox2+* and *cMaf+* cells, and contain  
128 an additional *MafB+* subpopulation (Francius et al., 2013). OC were present in *MafA+* but not  
129 in *MafB+*, *Bhlhb5+* or *Prdm8+* V2b subsets (Figure 1J-L"; Table 1; data not shown). In  
130 addition, OC were detected in V2c (non-progenitor *Sox1+* cells; Figure 1M-O"; Table 1) but  
131 not in V2d (*Shox2+Chx10-*) cells (Figure 1A-C"; Table 1). Thus, OC factors are present in  
132 multiple subpopulations of V2 INs.

133

### 134 **OC factors regulate the diversification of spinal V2 INs**

135 To determine whether OC proteins contribute to the development of V2 IN subsets, we  
136 characterized the phenotype of these cells in *Hnf6/Oc2* double-mutant embryos, which lack  
137 the three OC factors in the developing spinal cord (Kabayiza et al., 2017, Roy et al., 2012).  
138 Given that the number and the distribution of cells in each IN subpopulation vary along the  
139 anteroposterior axis of the spinal cord (Francius et al., 2013, Hayashi et al., 2018, Sweeney et  
140 al., 2018), this analysis was systematically performed at brachial, thoracic and lumbar levels  
141 at e12.5 and e14.5.

142 In the absence of OC factors, the total number of *Chx10+* INs was not significantly changed  
143 (Figure 2A-D; Supplementary Figure S1A-B), although a trend toward reduction was detected

144 at brachial level at e12.5 (Figure 2C). Consistently, the number of Chx10+Shox2+ INs was not  
145 changed (Figure 2E-H; Supplementary Figure S1C-D"). These observations suggest that OC  
146 are not necessary for V2a IN production. In contrast, the smaller V2a subpopulations  
147 wherein OC factors were detected in control embryos, characterized by the presence of  
148 MafA (Figure 1D-F") or cMaf (Figure 1G-I"), were almost completely lost in OC mutant  
149 embryos (Figure 2I-P; Supplementary Figure S1E-H"). As the total number of Chx10+ and of  
150 Shox2+ V2a was not changed (Figure 2A-H; Supplementary Figure S1A-D"), the loss of the  
151 MafA+ or cMaf+ subsets may be compensated for by expansion of other V2a  
152 subpopulations, markers of which remain to be identified. Nevertheless, our data indicate  
153 that OC factors are required either for the expression of V2 subpopulation markers or for the  
154 differentiation of specific V2a IN subsets.

155 To discriminate between these possibilities and to evaluate the contribution of OC factors to  
156 V2b diversification, we characterized the phenotype of V2b INs and of their MafA+  
157 subpopulation in the absence of OC proteins. As observed for V2a INs, the total number of  
158 V2b cells was not changed in OC mutant embryos (Figure 2Q-T; Supplementary Figure S1I-J),  
159 although a trend toward reduction was observed at brachial level at e12.5 (Figure 2S).  
160 However, in contrast to V2a, the MafA+ V2b INs were present in normal number in OC  
161 mutant embryos (Figure 2U-X; Supplementary Figure S1K-L"). Hence, OC factors are not  
162 necessary for the production of the MafA+ V2b subset, although they are required for  
163 proper differentiation of the MafA+ and of the cMaf+ V2a subpopulations.

164 Finally, we assessed the requirement for OC in the production of V2c INs, a V2 population  
165 strongly related to V2b cells (Panayi et al., 2010). Although weak production of Sox1 in spinal  
166 progenitors was preserved, V2c cells characterized by high Sox1 levels were scarcely  
167 detectable in OC mutant embryos at e12.5 (arrows in Figure 2Y-AA). However, the number  
168 of V2c was normal at e14.5 (Figure 2BB; Supplementary Figure S1M-N), suggesting that the  
169 absence of OC delays the differentiation of V2c INs without affecting the V2b population.  
170 Taken together, these observations demonstrate that OC proteins are not required for V2 IN  
171 production but regulate the diversification of V2 INs into multiple subpopulations.

172

### 173 **OC factors regulate the distribution of spinal V2 INs**

174 Although the total number of V2a or V2b INs was not affected by the absence of OC factors,  
175 careful examination of immunofluorescence labelings suggested that, as observed for spinal

176 dorsal INs (Kabayiza et al., 2017), OC proteins may regulate the distribution of V2 INs in the  
177 developing spinal cord (Figure 2A-B; Q-R). Therefore, quantitative distribution analyses  
178 (Kabayiza et al., 2017) were performed for each V2 population at brachial, thoracic or  
179 lumbar levels at e12.5, namely in the course of ventral IN migration, and at e14.5, i.e. when  
180 ventral IN migration in the transverse plane of the spinal cord is completed. Absence of the  
181 MafA<sup>+</sup> and cMaf<sup>+</sup> V2a subpopulations in OC mutants and the small size of other V2 subsets  
182 prevented analysis of subpopulation distribution.

183 At e12.5 in control embryos, V2a INs distributed in 2 connected clusters, a major central  
184 group and a minor medial group, at each level of the spinal cord (Figure 3A-C). In mutant  
185 embryos, V2a cells similarly distributed in connected central and medial groups. However,  
186 the relative cell distribution between the 2 clusters was altered, with less central cells at  
187 brachial level and less medial cells at lumbar levels (Figure 3D-L). Altered V2a distribution on  
188 the medio-lateral axis was confirmed at e14.5. In control embryos, the 2 V2a groups did  
189 coalesce in a more evenly-distributed population that occupied ~70% of the medio-lateral  
190 axis (Figure 3M-O). In mutant embryos, V2a INs remained segregated into 2 distinct,  
191 although connected, clusters with a majority of cells in medial position (Figure 3P-X). Thus,  
192 absence of OC factors perturbs proper distribution of the V2a INs and restricts at e14.5  
193 migration of a fraction of V2a cells in a medial position.

194 To assess whether OC also regulate the position of other V2 populations, we studied the  
195 distribution of V2b INs. At e12.5 in control embryos, V2b cells distributed in a major central  
196 (brachial level) or lateral (thoracic and lumbar levels) cluster with minor subsets located  
197 more medially (arrows in Figure 4A-C) or ventrally (arrowheads in Figure 4A-C). In OC mutant  
198 embryos at e12.5, the major population was more compact, more centrally located and  
199 slightly more ventral. In addition, the ventral V2b subset was significantly depleted (Figure  
200 4P-X). Consistently, at e14.5, V2b INs in the central cluster remained significantly more  
201 compact at thoracic level in the absence of OC factors, and identical trends were observed at  
202 brachial and lumbar levels (Figure 4M-X). In addition, a small contingent of V2b migrating  
203 towards the medio-dorsal spinal cord in control embryos (arrowheads in Figure 4N,O) was  
204 missing in OC mutant littermates (Figure 4Q-X). Taken together, these observations  
205 demonstrate that, in addition to V2 diversification, the OC transcription factors regulate  
206 proper distribution of V2 INs during spinal cord development.

207

## 208 **OC factors control expression of neuronal-specific isoforms of *Pou2f2***

209 To identify genes downstream of OC that may contribute to V2 IN differentiation and  
210 distribution, we performed a microarray comparison of control and of OC-deficient spinal  
211 cord transcriptome at e11.5, namely at the stage when significant numbers of V2 cells have  
212 been generated and are initiating migration (GEO repository accession number: GSE117871).  
213 Among genes showing a differential expression level in the OC mutant spinal cord, *Pou2f2*  
214 was significantly upregulated (1.57-fold increase). *Pou2f2* (previously named Oct-2) is a  
215 transcription factor containing a POU-specific domain and a POU-type homeodomain (Figure  
216 5A) that binds an octamer motif (consensus sequence ATGCAAAT) (Latchman, 1996). *Pou2f2*  
217 expression has been detected in B lymphocytes, in neuronal cell lines and in neural tissues  
218 including the developing CNS (Lillycrop and Latchman, 1992, Camos et al., 2014, Hatzopoulos  
219 et al., 1990). *Pou2f2* is required for differentiation of B lymphocytes and for postnatal  
220 survival (Corcoran et al., 1993, Corcoran et al., 2004, Hodson et al., 2016, Konig et al., 1995),  
221 and is able to modulate neuronal differentiation of ES cells (Theodorou et al., 2009).  
222 However, its role in the developing spinal cord remains unknown.

223 Based on work in B cells, multiple *Pou2f2* isoforms generated by alternative splicing have  
224 been described (Figure 5A; (Lillycrop and Latchman, 1992, Wirth et al., 1991, Hatzopoulos et  
225 al., 1990, Liu et al., 1995, Stoykova et al., 1992)). Therefore, we first determined whether  
226 similar isoforms are found in the developing spinal cord. However, we systematically failed  
227 to obtain RT-PCR products using upstream primers in described exon 1 (asterisks in  
228 Supplementary Figure S2A-B and data not shown; Table 2) and amplifications encompassing  
229 exons 5 to 6 generated predominant amplicons larger than expected (arrowheads in  
230 Supplementary Figure S2B; Table 2), suggesting the existence of alternative exons in *Pou2f2*  
231 embryonic spinal cord transcripts (Figure 5A). Data mining the NCBI Nucleotide database for  
232 *Pou2f2* sequences identified a predicted murine *Pou2f2* isoform (X6 sequence, accession  
233 number XM\_006539651.3) with a different exon 1 (E1X) and an additional sequence  
234 between exons 5 and 6, the size of which (279 bp) corresponded to the size differences  
235 estimated in our amplifications encompassing exons 5 to 6 (arrowheads in Supplementary  
236 Figure S2B; Table 2). Using PCR primers in this predicted sequence, we were able to amplify  
237 a 5' region of *Pou2f2* from the alternative E1X exon and an additional sequence between  
238 exons 5 and 6 (Supplementary Figure S2C; Table 2), suggesting that alternative isoforms  
239 similar to this predicted sequence are produced in the developing spinal cord. However,



240 amplifications from E1X systematically produced 2 amplicons (arrowheads in Supplementary  
241 Figure S2C; Table 2), suggesting the existence of an alternative exon downstream to E1X.  
242 Sequencing of our PCR products and alignment to genomic DNA confirmed that  
243 predominant *Pou2f2* isoforms in the developing spinal cord contain the alternative E1X exon,  
244 an additional exon (E5b) between exons 5 and 6, and can undergo alternative splicing of a  
245 short (61bp) exon (E1b) between E1X and exon 2 (Supplementary Figure S2D). E5b exon  
246 maintains the reading frame. In contrast E1b exon disrupts it, imposing the use of the ATG  
247 located in exon 2 to generate a functional *Pou2f2* protein, whereas the absence of E1b  
248 leaves open the use of an alternative upstream ATG located at the 3' end of E1X (Figure 5A;  
249 Supplementary Figure S2D). Hence, our RT-PCR and sequencing data indicate that 4  
250 neuronal *Pou2f2* isoforms different from the previously described B-cell or neural isoforms  
251 are produced in the developing spinal cord (Figure 5A).

252 However, minor transcripts corresponding to B-cell isoforms are also detected in the  
253 embryonic spinal cord (Supplementary Figure S2A-B; Table 2). To assess the relative  
254 abundance of each transcript type in this tissue and to evaluate the extent of their relative  
255 overexpression in the absence of OC factors, we quantified each isoform type in control and  
256 in OC-deficient spinal cord at e11.5. In control spinal cords, spinal *Pou2f2* isoforms were >30-  
257 fold more abundant than B-cell isoforms (Figure 5B), consistent with our RT-PCR  
258 observations (Supplementary Figure S2). In the absence of OC factors, spinal isoforms were  
259 ~2.6-fold overexpressed whereas B-cell isoforms barely trended to increase (Figure 5C-E).  
260 Thus, OC factors repress expression of spinal *Pou2f2* isoforms in the developing spinal cord.

261 To confirm these data and to determine the expression pattern of *Pou2f2* in the ventral  
262 spinal cord, *in situ* hybridization was performed on sections from control or *Hnf6/Oc2*  
263 double-mutant spinal cords using either a generic *Pou2f2* probe complementary to spinal  
264 and to B-cell isoforms or a spinal isoform-specific probe corresponding only to exon E5b  
265 (Figure 5A). Using the generic *Pou2f2* probe on control tissue, we detected *Pou2f2*  
266 transcripts in the ventral region of the spinal cord, with lower expression levels in the  
267 location of the motor columns (arrows in Figure 5F). In OC mutant embryos, *Pou2f2*  
268 expression was globally increased and additionally expanded in the ventral area (arrowheads  
269 in Figure 5F-G) including the motor neuron territories (arrows in Figure 5F-G). Similar  
270 observations were made with the spinal isoform-specific probe (Figure 5H-I). Thus, OC

271 factors restrict and moderate *Pou2f2* expression in ventral spinal populations likely including  
272 V2 INs.

273

#### 274 **Pou2f2-positive V2 INs are mislocated in the absence of OC factors**

275 To assess whether increased *Pou2f2* expression in *Hnf6<sup>-/-</sup>;Oc2<sup>-/-</sup>* spinal cords corresponded to  
276 an expansion of *Pou2f2* distribution in V2 INs or an upregulation in its endogenous  
277 expression territory, we first quantified the number and distribution of *Pou2f2*-containing  
278 *Chx10+* cells at e12.5 and e14.5 (Figure 6; Supplementary Figure S3). Immunofluorescence  
279 experiments demonstrated that *Pou2f2* is present in V2a INs in control embryos (Figure  
280 6A,C; Supplementary Figure S3A,D), although it was only sparsely detected in *MafA+* and  
281 *cMaf+* V2a subsets (data not shown). Intensity of the labeling confirmed increased *Pou2f2*  
282 production in the ventral regions of the spinal cord in OC mutant embryos (Figure 6A-F).  
283 However, the number in *Pou2f2*-positive V2a INs was not significantly different (Figure 6E-F;  
284 Supplementary Figure S3), suggesting that *Pou2f2* is increased in its endogenous expression  
285 domain. In contrast, the distribution of *Pou2f2*-positive V2a INs was affected (Figure 6A-D,  
286 6G-DD). At e12.5, cells in the central clusters were slightly reduced at brachial and at  
287 thoracic levels (Figure 6G-R). In contrast, at e14.5, a majority of V2a containing *Pou2f2*  
288 settled in a medial position (Figure 6S-DD), reminiscent of the distribution defects observed  
289 for the whole V2a population (Figure 3). Similarly, *Pou2f2* was detected in V2b INs in control  
290 embryos, although in a more restricted number of cells (Figure 7A-B, E). In the absence of OC  
291 factors, the number of *Pou2f2*-positive V2b cells was not significantly increased (Figure 7E-F)  
292 but, as observed for V2a, this subset of V2b INs was mislocated with cells more central at  
293 e12.5 and more clustered on the medio-lateral axis at e14.5 (Figure 7G-DD). Taken together,  
294 these observations suggest that *Pou2f2* may contribute to control V2 IN migration during  
295 spinal cord development and could participate in alterations of V2 distribution in the  
296 absence of OC factors.

297

#### 298 **Pou2f2 regulates the distribution of spinal V2 INs**

299 To determine whether *Pou2f2* is able to modulate V2 IN distribution, we overexpressed  
300 *Pou2f2* in the chicken embryonic spinal cord (Supplementary Figure S4). Increased *Pou2f2*  
301 did not impact on the number of V2a or V2b (Figure 8A-F). In contrast, it did alter V2 IN  
302 location. In HH27-28 control spinal cord, V2a INs were distributed in 2 closely connected

303 clusters on the medio-lateral axis of the neuroepithelium (Figure 8G). In electroporated  
304 spinal cord, lateral migration was increased and a majority of V2a INs were clustered in a  
305 single group in a central position (Figure 8H-J) with ectopic lateral extensions (arrow in  
306 Figure 8H). In control spinal cord, V2b were distributed in 2 groups along the medio-lateral  
307 axis with a majority of cells in the lateral cluster (Figure 8K). In electroporated spinal cord,  
308 the V2b INs were equally distributed between these 2 clusters (Figure 8L-N). Thus, consistent  
309 with our observation in OC mutant embryos, increased *Pou2f2* can modulate the distribution  
310 of V2 INs in the developing spinal cord.

311 To confirm the influence of *Pou2f2* on V2 migration, we studied V2 distribution in mouse  
312 embryos devoid of *Pou2f2* (Corcoran et al., 1993) at e12.5. Absence of *Pou2f2* did not impact  
313 on the number of V2a INs (Figure 9A-C) nor on the *Shox2+*, *cMaf+* or *MafA+* V2a subsets  
314 (Supplementary Figure S5). In contrast, V2a distribution was affected in *Pou2f2* mutants. As  
315 compared to the two V2a clusters observed in control embryos, *Chx10+* cells were more  
316 scattered in *Pou2f2* mutant embryos (Figure 9D-O). Furthermore, although the number of  
317 V2b, V2c or *MafA+* V2b cells was not changed in the absence of *Pou2f2* (Figure 10A-C;  
318 Supplementary Figure S6), V2b cells remained more medial at brachial and thoracic levels  
319 and segregated more extensively on the medio-lateral axis at lumbar levels (Figure 10D-O).  
320 Taken together, these observations demonstrate that *Pou2f2* regulate the distribution of V2  
321 INs during spinal cord development.

322

## 323 **Discussion**

324 In the recent years, several studies demonstrated that proper distribution of neuronal  
325 populations and subpopulations in the developing spinal cord is critical for adequate  
326 formation of spinal circuits (Bikoff et al., 2016, Goetz et al., 2015, Hayashi et al., 2018, Hilde  
327 et al., 2016, Surmeli et al., 2011, Tripodi et al., 2011). However, the genetic programs that  
328 control the diversification of spinal neuronal populations into specialized subpopulations  
329 and the proper settling of these neuronal subsets in the spinal parenchyma remain elusive.  
330 Here, we provide evidence that OC transcription factors regulate the diversification of spinal  
331 V2 INs, and that a genetic cascade involving OC factors and their downstream target Pou2f2  
332 controls the distribution of V2 INs in the developing spinal cord.

333

### 334 **Control of V2 IN diversification by the OC factors**

335 Cardinal populations of spinal ventral INs have been well characterized, and their global  
336 contribution to the activity of motor circuits has been extensively studied (reviewed in (Boije  
337 and Kullander, 2018, Gosgnach et al., 2017, Ziskind-Conhaim and Hochman, 2017). However,  
338 more recently, the idea emerged that these cardinal populations are not homogeneous  
339 ensembles but rather contain multiple neuronal subsets with distinct molecular identities  
340 and functional properties (Bikoff et al., 2016, Borowska et al., 2015, Borowska et al., 2013,  
341 Francius et al., 2013, Sweeney et al., 2018, Talpalar et al., 2013). V2a INs comprise two major  
342 divisions, namely type I and type II V2a cells, that are arrayed in counter-gradients along the  
343 antero-posterior axis of the spinal cord and activate different patterns of motor output at  
344 brachial or lumbar levels. Furthermore, these two large divisions can themselves be  
345 fractionated at birth into 11 subsets characterized by distinct combinations of markers,  
346 differential segmental localization and specific distribution patterns on the medio-lateral axis  
347 of the spinal cord (Hayashi et al., 2018). In the zebrafish, 3 distinct subclasses of V2a INs  
348 participate in separate microcircuit modules driving slow, intermediate or fast motor neuron  
349 activity (Ampatzis et al., 2014). Taken together, these observations suggest that cardinal IN  
350 populations only constitute the first organization level of functionally distinct neuronal  
351 subsets that contribute to diversity and flexibility within spinal motor circuits.

352 We showed here that OC factors are present in subsets of V2 INs and contribute to their  
353 diversification. Normal numbers of cardinal V2a and V2b cells were generated in OC mutant  
354 embryos, suggesting that these factors do not contribute to the production of V2 cells (Clovis

355 et al., 2016, Lee et al., 2008, Thaler et al., 2002) nor to the segregation of the V2a and V2b  
356 lineages through differential activation of Notch signaling (Del Barrio et al., 2007, Joshi et al.,  
357 2009, Misra et al., 2014, Peng et al., 2007). In contrast, V2a subpopulations characterized by  
358 the presence of MafA or cMaf were strongly depleted in the absence of OC proteins. This  
359 observation results either from a loss of these V2a subsets or from a downregulation of  
360 *MafA* or *cMaf* expression in these cells. Uncomplete knowledge of the whole collection of  
361 V2a subsets prevented to assess whether this apparent loss of specific subpopulations was  
362 compensated for by an expansion of neighboring subsets. Nevertheless, these data  
363 demonstrate altered differentiation of V2 IN subsets in the absence of OC factors, as  
364 previously observed for spinal motor neurons (Roy et al., 2012) and dorsal INs (Kabayiza et  
365 al., 2017). In addition, the production of V2c cells was delayed in OC mutant embryos,  
366 although V2b that are supposed to constitute the source of V2c (Panayi et al., 2010) were  
367 timely generated. This points to a specific contribution of OC protein to the development of  
368 V2c INs, the mechanism of which is currently unknown.

369

#### 370 **Control of V2 IN distribution by the OC factors**

371 Beside diversification, the characterization of functionally distinct IN subpopulations  
372 unveiled a strong correlation between the distribution of each IN subset and their  
373 contribution to distinct microcircuit modules (Bikoff et al., 2016, Borowska et al., 2013,  
374 Goetz et al., 2015, Hayashi et al., 2018, Hilde et al., 2016, Tripodi et al., 2011). These data  
375 support a model wherein correct localization of spinal IN subsets is critical for proper  
376 formation of sensory and sensory-motor circuits, highlighting the importance of a strict  
377 regulation of short-distance neuronal migration in the developing spinal cord. However,  
378 genetic determinants that control spinal IN migration have only been sparsely identified.  
379 *Sim1* regulate ventro-dorsal migration of the V3 IN subsets (Blacklaws et al., 2015). Similarly,  
380 *SATB2* control the position of inhibitory sensory relay INs along the medio-lateral axis of the  
381 spinal cord (Hilde et al., 2016). Here, we provide evidence that the OC factors control a  
382 genetic program that regulates proper positioning of V2 INs during embryonic development.  
383 In the absence of OC proteins, a fraction of V2a INs remained in a more medial location,  
384 expanding the medial cluster containing locally-projecting cells at the expense of the lateral  
385 cluster that comprises the supraspinal-projecting V2a INs (Hayashi et al., 2018). V2b  
386 alterations were less spectacular, although ventral and dorsal contingents were reduced and

387 the cell distribution in the central cluster was altered. Variability in the alterations observed  
388 at e12.5 and e14.5 highlights that spinal migration is not completed at e12.5 and suggests  
389 that distribution of earlier- or later-migrating neurons may be differently affected by the  
390 absence of OC proteins. In addition, migration along the anteroposterior axis, which can not  
391 be analyzed in our experimental setup, could also be perturbed. Alterations of the  
392 distribution of V2a and V2b interneurons likely correlate with alterations in their  
393 differentiation program. Indeed, the production of adequate cues to ensure proper cell  
394 positioning is an intrinsic component of any neuronal differentiation program (Blacklaws et  
395 al., 2015, Hayashi et al., 2018, Hilde et al., 2016). In any case, our observations are consistent  
396 with the contribution of OC factors to the migration of several populations of spinal dorsal  
397 INs (Kabayiza et al., 2017). This raises the question whether similar cues might be regulated  
398 by identical genetic programs and used by different IN populations to organize proper  
399 distribution of ventral and dorsal IN subsets in the developing spinal cord. Identification of  
400 the factors downstream of OC protein involved in the control of neuronal migration will be  
401 necessary to answer this question.

402

#### 403 **An OC-*Pou2f2* genetic cascade regulates the migration of V2 INs**

404 Therefore, we attempted to identify genes downstream of OC factors and possibly involved  
405 in the control of IN migration using a global approach comparing the transcriptome of whole  
406 spinal cords isolated from control or OC-deficient embryos. Absence of known regulators of  
407 neuronal migration among the most affected genes suggests that different actors may be  
408 active downstream of OC proteins in distinct IN populations to regulate proper neuronal  
409 distribution. In contrast, we uncovered that expression of the transcription factor *Pou2f2* is  
410 repressed by OC factors in different spinal populations. Surprisingly, our data demonstrated  
411 that variant *Pou2f2* isoforms are produced in the developing spinal cord as compared to B  
412 lymphocytes (Lillycrop and Latchman, 1992, Wirth et al., 1991, Hatzopoulos et al., 1990, Liu  
413 et al., 1995, Stoykova et al., 1992), and that these spinal variants are regulated by OC  
414 proteins. Spinal-enriched transcripts encode *Pou2f2* proteins containing additional peptidic  
415 sequences upstream of the POU-specific domain and of the homeodomain. Furthermore,  
416 exon 1 is different and corresponds to sequences located ~47kb upstream of the  
417 transcription initiation site used in B cells (data not shown) in the mouse genome, suggesting  
418 that OC regulate *Pou2f2* expression from an alternative promoter. However, we cannot

419 exclude that additional exon(s) could be present upstream of the identified sequences, and  
420 determination of the regulating sequences targeted by the OC protein will require thorough  
421 characterization of the produced transcripts. In addition, we cannot rule out indirect  
422 regulation of *Pou2f2* expression by the OC factors, as OC are usually considered to be  
423 transcriptional activators rather than repressors (Beaudry et al., 2006, Jacquemin et al.,  
424 2000, Jacquemin et al., 2003a, Lannoy et al., 2000, Pierreux et al., 2004, Roy et al., 2012).  
425 Nevertheless, our observations demonstrate that *Pou2f2* is downstream of OC factors in the  
426 V2 INs and also contributes to regulate the distribution of V2 INs during embryonic  
427 development. The number of *Pou2f2*-containing V2 was not significantly increased in OC  
428 mutant spinal cords, suggesting that the absence of OC protein resulted in relaxing of *Pou2f2*  
429 production in its endogenous expression domain rather than ectopic activation in other V2  
430 subsets. Increased production of *Pou2f2* in the chicken embryonic spinal cord resulted in  
431 alterations in the localization of V2 populations without any change in cell number, pointing  
432 to a possible contribution of *Pou2f2* to the regulation of V2 migration downstream of OC  
433 factors. Consistently, V2 distribution was perturbed in *Pou2f2* mutant embryos without any  
434 alteration in V2 population or subpopulation cell numbers, demonstrating the involvement  
435 of *Pou2f2* in the control of V2 IN distribution. Alterations in V2 distribution after *Pou2f2*  
436 electroporation were not comparable to that observed in OC mutant embryos and were not  
437 strictly opposite to *Pou2f2* knockout phenotype because the developmental stages obtained  
438 after chicken embryo electroporation were much earlier than the developmental stages of  
439 analyzed mouse embryos. Nevertheless, our data demonstrate that a genetic cascade  
440 comprising OC and *Pou2f2* transcription factors ensures proper distribution of V2 cells  
441 during spinal cord development. This program may not be restricted to V2 cells, as  
442 diversification and distribution of dorsal INs and of motor neurons are also altered in the  
443 absence of OC factors (Kabayiza et al., 2017, Roy et al., 2012) and as *Pou2f2* expression in  
444 the OC mutant spinal cord is increased in multiple neuronal populations.

## 445 **Materials and methods**

### 446 **Ethics statement and mouse lines**

447 All experiments were strictly performed in accordance with the European Community  
448 Council directive of 24 November 1986 (86-609/ECC) and the decree of 20 October 1987 (87-  
449 848/EEC). Mice were raised in our animal facilities and treated according to the principles of  
450 laboratory animal care, and experiments and mouse housing were approved by the Animal  
451 Welfare Committee of Université catholique de Louvain (Permit Number: 2013/UCL/MD/11  
452 and 2017/UCL/MD/008). The day of vaginal plug was considered to be embryonic day (e)  
453 0.5. A minimum of three embryos of the same genotype was analyzed in each experiment.  
454 The embryos were collected at e12.5 and e14.5. The *Hnf6;Oc2* and the *Pou2f2* mutant mice  
455 were previously described (Clotman et al., 2005, Corcoran et al., 1993, Jacquemin et al.,  
456 2000). In the *Hnf6<sup>-/-</sup>Oc2<sup>-/-</sup>* embryos, expression of *Oc3* is completely downregulated in the  
457 developing spinal cord (Kabayiza et al., 2017, Roy et al., 2012), enabling to study spinal cord  
458 development in the absence of the 3 OC factors. The mice and the embryos were genotyped  
459 by PCR (primer information available on request).

460

### 461 ***In situ* hybridization (ISH) and immunofluorescence labelings**

462 For ISH, the collected embryos were fixed in ice-cold 4% paraformaldehyde (PFA) in  
463 phosphate buffered-saline (PBS) overnight at 4°C, washed thrice in PBS for 10 minutes,  
464 incubated in PBS/30% sucrose solution overnight at 4°C, embedded and frozen in PBS/15%  
465 sucrose/7.5% gelatin. Fourteen  $\mu$ m section were prepared and ISH was performed as  
466 previously described (Beguín et al., 2013, Francius et al., 2016, Pelosi et al., 2014) with DIG-  
467 conjugated *Pou2f2* (NM\_011138.1, nucleotides 604-1187) or *Pou2f2* exon 5b  
468 (XM\_006539651.3, nucleotides 643-876) antisense RNA probes. Control and *Onecut* mutant  
469 sections were placed adjacent on the same histology slides to minimize inter-slide variations  
470 in ISH signals.

471 For immunofluorescence, collected embryos were fixed in 4% PFA/PBS for 25 or 35 minutes  
472 according to their embryonic stage and processed as for ISH. Immunolabeling was  
473 performed on 14  $\mu$ m serial cryosections as previously described (Francius and Clotman,  
474 2010). Primary antibodies against the following proteins were used: Chx10 (sheep; 1:500;  
475 Exalpha Biologicals #X1179P), *Foxp1* (goat; 1:1000; R&D Systems #AF4534), *Gata3* (rat; 1:50;  
476 Absea Biotechnology #111214D02), GFP (chick; 1:1000; Aves Lab #GFP-1020), HNF6 (guinea



477 pig; 1:2000; (España and Clotman, 2012b); or rabbit; 1:100; Santa Cruz #sc-13050; or sheep;  
478 1:1000 R&D Systems #AF6277), cMaf (rabbit; 1:3000; kindly provided by H. Wende), MafA  
479 (guinea pig; 1:500; kindly provide by T. Müller), OC2 (rat; 1:400; (Clotman et al., 2005); or  
480 sheep; 1:500; R&D Systems #AF6294), OC3 (guinea pig; 1:6000; (Pierreux et al., 2004)),  
481 Pou2f2 (rabbit; 1:2000; Abcam #ab178679), Shox2 (mouse; 1:500; Abcam #ab55740), Sox1  
482 (goat; 1:500; Santa Cruz #sc-17318). Secondary antibodies donkey anti-guinea  
483 pig/AlexaFluor 488, 594 or 647, anti-mouse/AlexaFluor 488, 594 or 647, anti-  
484 rabbit/AlexaFluor 594 or 647, anti-goat/AlexaFluor 488, anti-rat/AlexaFluor 647, anti-  
485 sheep/AlexaFluor 594 or 647, and goat anti-mouse IgG2A specific/AlexiaFluor 488,  
486 purchased from ThermoFisher Scientific or Jackson Laboratories were used at dilution  
487 1:2000 or 1:1000, respectively.

488

#### 489 ***In ovo* electroporation**

490 *In ovo* electroporations were performed at stage HH14-16, as previously described (Roy et  
491 al., 2012). The coding sequence of the S\_Pou2f2.4 transcript was amplified by overlapping-  
492 PCR using: forward 5' GCTCTGTCTGCCCAAGAGAAA 3' and reverse 5'  
493 GTTGGGACAAGGTGAGCTGT 3' primers for the 5' sequence, forward 5'  
494 CCACCATCACAGCCTACCAG 3' and reverse 5' ATTATCTCGAGCCAGCCTCCTTACCCTCTCT 3'  
495 (designed to enable integration at the *Xho*I restriction site of the pCMV-MCS vector) primers  
496 for the 3' sequence. This sequence was first subcloned in a pCR<sup>®</sup>II-Topo<sup>®</sup> vector (Life  
497 Technologies, 45-0640) for sequencing then subcloned at the *Eco*RI (from the pCR<sup>®</sup>II-Topo<sup>®</sup>  
498 vector) and *Xho*I restriction sites of a pCMV-MCS vector for the *in ovo* electroporation. The  
499 pCMV-Pou2f2 (0.5 µg/µl) vector was co-electroporated with a pCMV-eGFP plasmid  
500 (0.25µg/µl) to visualize electroporated cells. The embryos were collected 72 hours (HH27-  
501 28) after electroporation, fixed in PBS/4%PFA for 45 minutes and processed for  
502 immunofluorescence labelings as previously described (Francius and Clotman, 2010). To  
503 minimize stage and experimental condition variations, the non-electroporated side of the  
504 spinal cord was used as control for quantification and distribution analyses.

505

#### 506 **Imaging and quantitative analyses**

507 Immunofluorescence and ISH images of cryosections were acquired on an EVOS FL Auto  
508 Imaging System (Thermo Fisher Scientific) or a Confocal laser Scanning biological microscope

509 FV1000 Fluoview with the FV10-ASW 01.02 software (Olympus). The images were processed  
510 with Adobe Photoshop CS5 software to match brightness and contrast with the observation.  
511 Quantifications were performed by subtractive method (Francius and Clotman, 2010). For  
512 each embryo ( $n \geq 3$ ), one side of three to five sections at brachial, thoracic or lumbar level  
513 were quantified using the count analysis tool of Adobe Photoshop CS5 software. Raw data  
514 were exported from Adobe Photoshop CS5 software to Sigma Plotv12.3 software to perform  
515 statistical analyses. The histograms were drawn with Microsoft Excel. Adequate statistical  
516 tests (standard Student's *t*-tests or Mann-Whitney U tests) were applied depending on the  
517 number of comparisons and on the variance in each group. Quantitative analyses were  
518 considered significant at  $p \leq 0.05$ .

519 Quantitative analyzes of IN spatial distribution were performed as previously described  
520 (Kabayiza et al., 2017). Statistical analyses of ventral IN distribution were performed using a  
521 two-sample Hotelling's  $T^2$ , which is a two-dimensional generalization of the Student's *t* test.  
522 The analysis was implemented using the NCCS software package.

523

#### 524 **Microarray analyses**

525 RNA was extracted from control or *Hnf6/Oc2* double-mutant spinal cords. The tissue was  
526 manually dissociated in Tripur isolation reagent (Roche, 11 667 165 001). After dissociation,  
527 chloroform (Merck Millipore, 1 02445 1000) was added to the sample, incubated at room  
528 temperature for 10 minutes and centrifugated for 10 minutes at 4°C. The aqueous phase  
529 was collected and the RNA was precipitated with isopropanol (VWR, 20880.310) and  
530 centrifugated for 15 minutes at 4°C. The pellet was washed in ethanol (Biosolve, 06250502)  
531 and centrifugated for 10 minutes at 4°C. The dried pellet was resuspended in RNase free  
532 water. The integrity of the RNA was assessed using an Agilent RNA 6000 Nano assay  
533 procedure. For microarray analyzes, the RNA was converted in single-strand cDNA, labeled  
534 using the GeneChip® WT PLUS Reagent Kit (Affymetrix) and hybridized on the GeneChip®  
535 MoGene 2.0 ST array (Affymetrix, 90 2118) using Affymetrix devices: Genechip® Fluidics  
536 Station 450, Genechip® Hybridization oven 640, Affymetrix Genechip® scanner and the  
537 Expression Consol software. The analyzes were performed using the R software. Microarray  
538 data have been deposited in the GEO repository (accession number: GSE117871).

539

540

541 **Amplification of *Pou2f2* isoforms and sequencing**

542 Fragments of the different *Pou2f2* isoforms were amplified by RT-PCR from RNA of control B  
543 lymphocytes or embryonic spinal cords purified as described above using the iScript™  
544 Reverse transcriptase and the 5x iScript™ reaction mix (BioRad). *Pou2f2* sequences (Table 2)  
545 were amplified using a GoTaq® Green master mix (Promega, M712) or a Q5® Hot Start High-  
546 Fidelity DNA Polymerase (New England BioLabs® Inc, M0493S) (primer information available  
547 on request). Sequencing of the spinal *Pou2f2* exons was outsourced to Genewiz.  
548 Quantitative real-time PCR was performed on 1/100 of the retrotranscription reaction using  
549 iTaq™ universal SYBR® Green Supermix (BioRad, 172-5124) on a CFX Connect™ Real-Time  
550 System (BioRad) with the BioRad CFX Manage 3.1 software. Each reaction was performed in  
551 duplicate and relative mRNA quantities were normalized to the housekeeping gene RPL32  
552 (primer information available on request). Relative expression changes between conditions  
553 were calculated using the  $\Delta\Delta C_t$  method. All changes are shown as fold changes.

554

555 **Acknowledgements**

556 We thank members of the NEDI lab for material, technical support and discussions. We are  
557 grateful to Drs. T. Müller and H. Wende for kindly providing the guinea pig anti MafA and the  
558 rabbit anti cMaf antibodies, respectively, to Drs. F. Lemaigre and P. Jacquemin for the  
559 Hnf6/Oc2 double mutant mice, to Dr. C. Pierreux for the pCMV-MCS, to Dr. J. Ambroise for  
560 assistance with the microarray analyses and to Dr. L. Dumoutier for cDNA of B lymphocytes.

561

562 **Competing interests:** the authors declare no competing interest

563

564 **Funding**

565 Work in the F.C. laboratory was supported by grants from the "Fonds spéciaux de recherche"  
566 (FSR) of the Université catholique de Louvain, by a "Projet de recherche (PDR)" #T.0117.13  
567 and an "Equipement (EQP)" funding #U.N027.14 of the Fonds de la Recherche Scientifique  
568 (F.R.S.-FNRS, Belgium), by the "Actions de Recherche Concertées (ARC)" #10/15-026 of the  
569 "Direction générale de l'Enseignement non obligatoire et de la Recherche scientifique –  
570 Direction de la Recherche scientifique – Communauté française de Belgique" and granted by  
571 the "Académie universitaire 'Louvain'" and by the Association Belge contre les Maladies  
572 neuro-Musculaires. L.M.C. acknowledges funding from the Australian Government (NHMRC  
573 IRIS and research grants #637306 and #575500) and Victorian State Government  
574 Operational Infrastructure Support. S.D. and C.B. hold PhD grants from the Fonds pour la  
575 Recherche dans l'Industrie et l'Agriculture (F.R.S.-FNRS, Belgium), M.H.-F. was a Postdoctoral  
576 Researcher of the F.R.S.-FNRS, F.C. is a Senior Research Associate of the F.R.S.-FNRS.

577

## 578 References

- 579 AMPATZIS, K., SONG, J., AUSBORN, J. & EL MANIRA, A. 2014. Separate microcircuit modules  
580 of distinct v2a interneurons and motoneurons control the speed of locomotion.  
581 *Neuron*, 83, 934-43.
- 582 AUDOUARD, E., SCHAKMAN, O., GINION, A., BERTRAND, L., GAILLY, P. & CLOTMAN, F. 2013.  
583 The Onecut transcription factor HNF-6 contributes to proper reorganization of  
584 Purkinje cells during postnatal cerebellum development. *Mol Cell Neurosci*, 56, 159-  
585 68.
- 586 AUDOUARD, E., SCHAKMAN, O., RENE, F., HUETTL, R. E., HUBER, A. B., LOEFFLER, J. P.,  
587 GAILLY, P. & CLOTMAN, F. 2012. The Onecut transcription factor HNF-6 regulates in  
588 motor neurons the formation of the neuromuscular junctions. *PLoS One*, 7, e50509.
- 589 BARBER, M. & PIERANI, A. 2016. Tangential migration of glutamatergic neurons and cortical  
590 patterning during development: Lessons from Cajal-Retzius cells. *Dev Neurobiol*, 76,  
591 847-81.
- 592 BEAUDRY, J. B., PIERREUX, C. E., HAYHURST, G. P., PLUMB-RUDEWIEZ, N., WEISS, M. C.,  
593 ROUSSEAU, G. G. & LEMAIGRE, F. P. 2006. Threshold levels of hepatocyte nuclear  
594 factor 6 (HNF-6) acting in synergy with HNF-4 and PGC-1alpha are required for time-  
595 specific gene expression during liver development. *Mol Cell Biol*, 26, 6037-46.
- 596 BEGUIN, S., CREPEL, V., ANIKSZTEJN, L., BECQ, H., PELOSI, B., PALLESI-POCACHARD, E.,  
597 BOUAMRANE, L., PASQUALETTI, M., KITAMURA, K., CARDOSO, C. & REPRESA, A.  
598 2013. An epilepsy-related ARX polyalanine expansion modifies glutamatergic neurons  
599 excitability and morphology without affecting GABAergic neurons development.  
600 *Cereb Cortex*, 23, 1484-94.
- 601 BIKOFF, J. B., GABITTO, M. I., RIVARD, A. F., DROBAC, E., MACHADO, T. A., MIRI, A.,  
602 BRENNER-MORTON, S., FAMOJURE, E., DIAZ, C., ALVAREZ, F. J., MENTIS, G. Z. &  
603 JESSELL, T. M. 2016. Spinal Inhibitory Interneuron Diversity Delineates Variant Motor  
604 Microcircuits. *Cell*, 165, 207-19.
- 605 BLACKLAWS, J., DESKA-GAUTHIER, D., JONES, C. T., PETRACCA, Y. L., LIU, M., ZHANG, H.,  
606 FAWCETT, J. P., GLOVER, J. C., LANUZA, G. M. & ZHANG, Y. 2015. Sim1 is required for  
607 the migration and axonal projections of V3 interneurons in the developing mouse  
608 spinal cord. *Dev Neurobiol*, 75, 1003-17.
- 609 BOIJE, H. & KULLANDER, K. 2018. Origin and circuitry of spinal locomotor interneurons  
610 generating different speeds. *Curr Opin Neurobiol*, 53, 16-21.
- 611 BOROWSKA, J., JONES, C. T., DESKA-GAUTHIER, D. & ZHANG, Y. 2015. V3 interneuron  
612 subpopulations in the mouse spinal cord undergo distinctive postnatal maturation  
613 processes. *Neuroscience*, 295, 221-8.
- 614 BOROWSKA, J., JONES, C. T., ZHANG, H., BLACKLAWS, J., GOULDING, M. & ZHANG, Y. 2013.  
615 Functional subpopulations of V3 interneurons in the mature mouse spinal cord. *J*  
616 *Neurosci*, 33, 18553-65.
- 617 BRITZ, O., ZHANG, J., GROSSMANN, K. S., DYCK, J., KIM, J. C., DYMECKI, S., GOSGNACH, S. &  
618 GOULDING, M. 2015. A genetically defined asymmetry underlies the inhibitory  
619 control of flexor-extensor locomotor movements. *Elife*, 4.
- 620 CAMOS, S., GUBERN, C., SOBRADO, M., RODRIGUEZ, R., ROMERA, V. G., MORO, M. A.,  
621 LIZASOAIN, I., SERENA, J., MALLOLAS, J. & CASTELLANOS, M. 2014. Oct-2  
622 transcription factor binding activity and expression up-regulation in rat cerebral  
623 ischaemia is associated with a diminution of neuronal damage in vitro.  
624 *Neuromolecular Med*, 16, 332-49.

- 625 CATELA, C., SHIN, M. M. & DASEN, J. S. 2015. Assembly and function of spinal circuits for  
626 motor control. *Annu Rev Cell Dev Biol*, 31, 669-98.
- 627 CLOTMAN, F., JACQUEMIN, P., PLUMB-RUDEWIEZ, N., PIERREUX, C. E., VAN DER SMISSEN,  
628 P., DIETZ, H. C., COURTOY, P. J., ROUSSEAU, G. G. & LEMAIGRE, F. P. 2005. Control of  
629 liver cell fate decision by a gradient of TGF beta signaling modulated by Onecut  
630 transcription factors. *Genes Dev*, 19, 1849-54.
- 631 CLOVIS, Y. M., SEO, S. Y., KWON, J. S., RHEE, J. C., YEO, S., LEE, J. W., LEE, S. & LEE, S. K. 2016.  
632 Chx10 Consolidates V2a Interneuron Identity through Two Distinct Gene Repression  
633 Modes. *Cell Rep*, 16, 1642-52.
- 634 CORCORAN, L. M., KARVELAS, M., NOSSAL, G. J., YE, Z. S., JACKS, T. & BALTIMORE, D. 1993.  
635 Oct-2, although not required for early B-cell development, is critical for later B-cell  
636 maturation and for postnatal survival. *Genes Dev*, 7, 570-82.
- 637 CORCORAN, L. M., KOENTGEN, F., DIETRICH, W., VEALE, M. & HUMBERT, P. O. 2004. All  
638 known in vivo functions of the Oct-2 transcription factor require the C-terminal  
639 protein domain. *J Immunol*, 172, 2962-9.
- 640 CRONE, S. A., QUINLAN, K. A., ZAGORAIU, L., DROHO, S., RESTREPO, C. E., LUNDFALD, L.,  
641 ENDO, T., SETLAK, J., JESSELL, T. M., KIEHN, O. & SHARMA, K. 2008. Genetic ablation  
642 of V2a ipsilateral interneurons disrupts left-right locomotor coordination in  
643 mammalian spinal cord. *Neuron*, 60, 70-83.
- 644 DEL BARRIO, M. G., TAVEIRA-MARQUES, R., MUROYAMA, Y., YUK, D. I., LI, S., WINES-  
645 SAMUELSON, M., SHEN, J., SMITH, H. K., XIANG, M., ROWITCH, D. & RICHARDSON, W.  
646 D. 2007. A regulatory network involving Foxn4, Mash1 and delta-like 4/Notch1  
647 generates V2a and V2b spinal interneurons from a common progenitor pool.  
648 *Development*, 134, 3427-36.
- 649 DOUGHERTY, K. J. & KIEHN, O. 2010. Firing and cellular properties of V2a interneurons in the  
650 rodent spinal cord. *J Neurosci*, 30, 24-37.
- 651 DOUGHERTY, K. J., ZAGORAIU, L., SATOH, D., ROZANI, I., DOOBAR, S., ARBER, S., JESSELL, T.  
652 M. & KIEHN, O. 2013. Locomotor rhythm generation linked to the output of spinal  
653 shox2 excitatory interneurons. *Neuron*, 80, 920-33.
- 654 ESPANA, A. & CLOTMAN, F. 2012a. Onecut factors control development of the Locus  
655 Coeruleus and of the mesencephalic trigeminal nucleus. *Mol Cell Neurosci*, 50, 93-  
656 102.
- 657 ESPANA, A. & CLOTMAN, F. 2012b. Onecut transcription factors are required for the second  
658 phase of development of the A13 dopaminergic nucleus in the mouse. *J Comp  
659 Neurol*, 520, 1424-41.
- 660 FRANCIUS, C. & CLOTMAN, F. 2010. Dynamic expression of the Onecut transcription factors  
661 HNF-6, OC-2 and OC-3 during spinal motor neuron development. *Neuroscience*, 165,  
662 116-29.
- 663 FRANCIUS, C. & CLOTMAN, F. 2014. Generating spinal motor neuron diversity: a long quest  
664 for neuronal identity. *Cell Mol Life Sci*, 71, 813-29.
- 665 FRANCIUS, C., HARRIS, A., RUCCHIN, V., HENDRICKS, T. J., STAM, F. J., BARBER, M., KUREK,  
666 D., GROSVELD, F. G., PIERANI, A., GOULDING, M. & CLOTMAN, F. 2013. Identification  
667 of multiple subsets of ventral interneurons and differential distribution along the  
668 rostrocaudal axis of the developing spinal cord. *PLoS One*, 8, e70325.
- 669 FRANCIUS, C., HIDALGO-FIGUEROA, M., DEBRULLE, S., PELOSI, B., RUCCHIN, V.,  
670 RONELLENFITCH, K., PANAYIOTOU, E., MAKRIDES, N., MISRA, K., HARRIS, A.,  
671 HASSANI, H., SCHAKMAN, O., PARRAS, C., XIANG, M., MALAS, S., CHOW, R. L. &

- 672 CLOTMAN, F. 2016. Vsx1 Transiently Defines an Early Intermediate V2 Interneuron  
673 Precursor Compartment in the Mouse Developing Spinal Cord. *Front Mol Neurosci*, 9,  
674 145.
- 675 GOETZ, C., PIVETTA, C. & ARBER, S. 2015. Distinct limb and trunk premotor circuits establish  
676 laterality in the spinal cord. *Neuron*, 85, 131-144.
- 677 GOSGNACH, S., BIKOFF, J. B., DOUGHERTY, K. J., EL MANIRA, A., LANUZA, G. M. & ZHANG, Y.  
678 2017. Delineating the Diversity of Spinal Interneurons in Locomotor Circuits. *J*  
679 *Neurosci*, 37, 10835-10841.
- 680 GROSSMANN, K. S., GIRAUDIN, A., BRITZ, O., ZHANG, J. & GOULDING, M. 2010. Genetic  
681 dissection of rhythmic motor networks in mice. *Prog Brain Res*, 187, 19-37.
- 682 GUO, J. & ANTON, E. S. 2014. Decision making during interneuron migration in the  
683 developing cerebral cortex. *Trends Cell Biol*, 24, 342-51.
- 684 HATZOPOULOS, A. K., STOYKOVA, A. S., ERSELIUS, J. R., GOULDING, M., NEUMAN, T. &  
685 GRUSS, P. 1990. Structure and expression of the mouse Oct2a and Oct2b, two  
686 differentially spliced products of the same gene. *Development*, 109, 349-62.
- 687 HAYASHI, M., HINCKLEY, C. A., DRISCOLL, S. P., MOORE, N. J., LEVINE, A. J., HILDE, K. L.,  
688 SHARMA, K. & PFAFF, S. L. 2018. Graded Arrays of Spinal and Supraspinal V2a  
689 Interneuron Subtypes Underlie Forelimb and Hindlimb Motor Control. *Neuron*, 97,  
690 869-884 e5.
- 691 HILDE, K. L., LEVINE, A. J., HINCKLEY, C. A., HAYASHI, M., MONTGOMERY, J. M., GULLO, M.,  
692 DRISCOLL, S. P., GROSSCHEDL, R., KOHWI, Y., KOHWI-SHIGEMATSU, T. & PFAFF, S. L.  
693 2016. Satb2 Is Required for the Development of a Spinal Exteroceptive Microcircuit  
694 that Modulates Limb Position. *Neuron*, 91, 763-776.
- 695 HODSON, D. J., SHAFFER, A. L., XIAO, W., WRIGHT, G. W., SCHMITZ, R., PHELAN, J. D., YANG,  
696 Y., WEBSTER, D. E., RUI, L., KOHLHAMMER, H., NAKAGAWA, M., WALDMANN, T. A. &  
697 STAUDT, L. M. 2016. Regulation of normal B-cell differentiation and malignant B-cell  
698 survival by OCT2. *Proc Natl Acad Sci U S A*, 113, E2039-46.
- 699 JACQUEMIN, P., DURVIAUX, S. M., JENSEN, J., GODFRAIND, C., GRADWOHL, G., GUILLEMOT,  
700 F., MADSEN, O. D., CARMELIET, P., DEWERCHIN, M., COLLEN, D., ROUSSEAU, G. G. &  
701 LEMAIGRE, F. P. 2000. Transcription factor hepatocyte nuclear factor 6 regulates  
702 pancreatic endocrine cell differentiation and controls expression of the proendocrine  
703 gene *ngn3*. *Mol Cell Biol*, 20, 4445-54.
- 704 JACQUEMIN, P., LANNOY, V. J., ROUSSEAU, G. G. & LEMAIGRE, F. P. 1999. OC-2, a novel  
705 mammalian member of the ONECUT class of homeodomain transcription factors  
706 whose function in liver partially overlaps with that of hepatocyte nuclear factor-6. *J*  
707 *Biol Chem*, 274, 2665-71.
- 708 JACQUEMIN, P., LEMAIGRE, F. P. & ROUSSEAU, G. G. 2003a. The Onecut transcription factor  
709 HNF-6 (OC-1) is required for timely specification of the pancreas and acts upstream  
710 of Pdx-1 in the specification cascade. *Dev Biol*, 258, 105-16.
- 711 JACQUEMIN, P., PIERREUX, C. E., FIERENS, S., VAN EYLL, J. M., LEMAIGRE, F. P. & ROUSSEAU,  
712 G. G. 2003b. Cloning and embryonic expression pattern of the mouse Onecut  
713 transcription factor OC-2. *Gene Expr Patterns*, 3, 639-44.
- 714 JOSHI, K., LEE, S., LEE, B., LEE, J. W. & LEE, S. K. 2009. LMO4 controls the balance between  
715 excitatory and inhibitory spinal V2 interneurons. *Neuron*, 61, 839-51.
- 716 KABAYIZA, K. U., MASGUTOVA, G., HARRIS, A., RUCCHIN, V., JACOB, B. & CLOTMAN, F. 2017.  
717 The Onecut Transcription Factors Regulate Differentiation and Distribution of Dorsal  
718 Interneurons during Spinal Cord Development. *Front Mol Neurosci*, 10, 157.

- 719 KONIG, H., PFISTERER, P., CORCORAN, L. M. & WIRTH, T. 1995. Identification of CD36 as the  
720 first gene dependent on the B-cell differentiation factor Oct-2. *Genes Dev*, 9, 1598-  
721 607.
- 722 LAI, H. C., SEAL, R. P. & JOHNSON, J. E. 2016. Making sense out of spinal cord somatosensory  
723 development. *Development*, 143, 3434-3448.
- 724 LANDRY, C., CLOTMAN, F., HIOKI, T., ODA, H., PICARD, J. J., LEMAIGRE, F. P. & ROUSSEAU, G.  
725 G. 1997. HNF-6 is expressed in endoderm derivatives and nervous system of the  
726 mouse embryo and participates to the cross-regulatory network of liver-enriched  
727 transcription factors. *Dev Biol*, 192, 247-57.
- 728 LANNOY, V. J., RODOLOSSE, A., PIERREUX, C. E., ROUSSEAU, G. G. & LEMAIGRE, F. P. 2000.  
729 Transcriptional stimulation by hepatocyte nuclear factor-6. Target-specific  
730 recruitment of either CREB-binding protein (CBP) or p300/CBP-associated factor  
731 (p/CAF). *J Biol Chem*, 275, 22098-103.
- 732 LATCHMAN, D. S. 1996. The Oct-2 transcription factor. *Int J Biochem Cell Biol*, 28, 1081-3.
- 733 LEE, S., LEE, B., JOSHI, K., PFAFF, S. L., LEE, J. W. & LEE, S. K. 2008. A regulatory network to  
734 segregate the identity of neuronal subtypes. *Dev Cell*, 14, 877-89.
- 735 LEMAIGRE, F. P., DURVIAUX, S. M., TRUONG, O., LANNOY, V. J., HSUAN, J. J. & ROUSSEAU, G.  
736 G. 1996. Hepatocyte nuclear factor 6, a transcription factor that contains a novel type  
737 of homeodomain and a single cut domain. *Proc Natl Acad Sci U S A*, 93, 9460-4.
- 738 LILLYCROP, K. A. & LATCHMAN, D. S. 1992. Alternative splicing of the Oct-2 transcription  
739 factor RNA is differentially regulated in neuronal cells and B cells and results in  
740 protein isoforms with opposite effects on the activity of octamer/TAATGARAT-  
741 containing promoters. *J Biol Chem*, 267, 24960-5.
- 742 LIU, Y. Z., LILLYCROP, K. A. & LATCHMAN, D. S. 1995. Regulated splicing of the Oct-2  
743 transcription factor RNA in neuronal cells. *Neurosci Lett*, 183, 8-12.
- 744 LU, D. C., NIU, T. & ALAYNICK, W. A. 2015. Molecular and cellular development of spinal cord  
745 locomotor circuitry. *Front Mol Neurosci*, 8, 25.
- 746 MISRA, K., LUO, H., LI, S., MATISE, M. & XIANG, M. 2014. Asymmetric activation of Dll4-  
747 Notch signaling by Foxn4 and proneural factors activates BMP/TGFbeta signaling to  
748 specify V2b interneurons in the spinal cord. *Development*, 141, 187-98.
- 749 PANAYI, H., PANAYIOTOU, E., ORFORD, M., GENETHLIOU, N., MEAN, R., LAPATHITIS, G., LI, S.,  
750 XIANG, M., KESSARIS, N., RICHARDSON, W. D. & MALAS, S. 2010. Sox1 is required for  
751 the specification of a novel p2-derived interneuron subtype in the mouse ventral  
752 spinal cord. *J Neurosci*, 30, 12274-80.
- 753 PELOSI, B., MIGLIARINI, S., PACINI, G., PRATELLI, M. & PASQUALETTI, M. 2014. Generation of  
754 Pet1210-Cre transgenic mouse line reveals non-serotonergic expression domains of  
755 Pet1 both in CNS and periphery. *PLoS One*, 9, e104318.
- 756 PENG, C. Y., YAJIMA, H., BURNS, C. E., ZON, L. I., SISODIA, S. S., PFAFF, S. L. & SHARMA, K.  
757 2007. Notch and MAML signaling drives Scf-dependent interneuron diversity in the  
758 spinal cord. *Neuron*, 53, 813-27.
- 759 PIERREUX, C. E., VANHORENBEECK, V., JACQUEMIN, P., LEMAIGRE, F. P. & ROUSSEAU, G. G.  
760 2004. The transcription factor hepatocyte nuclear factor-6/Onecut-1 controls the  
761 expression of its paralog Onecut-3 in developing mouse endoderm. *J Biol Chem*, 279,  
762 51298-304.
- 763 ROY, A., FRANCIUS, C., ROUSSO, D. L., SEUNTJENS, E., DEBRUYN, J., LUXENHOFER, G., HUBER,  
764 A. B., HUYLEBROECK, D., NOVITCH, B. G. & CLOTMAN, F. 2012. Onecut transcription



- 765 factors act upstream of *Isl1* to regulate spinal motoneuron diversification.  
766 *Development*, 139, 3109-19.
- 767 STAM, F. J., HENDRICKS, T. J., ZHANG, J., GEIMAN, E. J., FRANCIUS, C., LABOSKY, P. A.,  
768 CLOTMAN, F. & GOULDING, M. 2012. Renshaw cell interneuron specialization is  
769 controlled by a temporally restricted transcription factor program. *Development*,  
770 139, 179-90.
- 771 STOYKOVA, A. S., STERRER, S., ERSELIUS, J. R., HATZOPOULOS, A. K. & GRUSS, P. 1992. Mini-  
772 Oct and Oct-2c: two novel, functionally diverse murine Oct-2 gene products are  
773 differentially expressed in the CNS. *Neuron*, 8, 541-58.
- 774 SURMELI, G., AKAY, T., IPPOLITO, G. C., TUCKER, P. W. & JESSELL, T. M. 2011. Patterns of  
775 spinal sensory-motor connectivity prescribed by a dorsoventral positional template.  
776 *Cell*, 147, 653-65.
- 777 SWEENEY, L. B., BIKOFF, J. B., GABITTO, M. I., BRENNER-MORTON, S., BAEK, M., YANG, J. H.,  
778 TABAK, E. G., DASEN, J. S., KINTNER, C. R. & JESSELL, T. M. 2018. Origin and  
779 Segmental Diversity of Spinal Inhibitory Interneurons. *Neuron*, 97, 341-355 e3.
- 780 TALPALAR, A. E., BOUVIER, J., BORGIUS, L., FORTIN, G., PIERANI, A. & KIEHN, O. 2013. Dual-  
781 mode operation of neuronal networks involved in left-right alternation. *Nature*, 500,  
782 85-8.
- 783 THALER, J. P., LEE, S. K., JURATA, L. W., GILL, G. N. & PFAFF, S. L. 2002. LIM factor *Lhx3*  
784 contributes to the specification of motor neuron and interneuron identity through  
785 cell-type-specific protein-protein interactions. *Cell*, 110, 237-49.
- 786 THEODOROU, E., DALEMBERT, G., HEFFELFINGER, C., WHITE, E., WEISSMAN, S., CORCORAN,  
787 L. & SNYDER, M. 2009. A high throughput embryonic stem cell screen identifies Oct-2  
788 as a bifunctional regulator of neuronal differentiation. *Genes Dev*, 23, 575-88.
- 789 TRIPODI, M., STEPIEN, A. E. & ARBER, S. 2011. Motor antagonism exposed by spatial  
790 segregation and timing of neurogenesis. *Nature*, 479, 61-6.
- 791 VANHORENBEECK, V., JACQUEMIN, P., LEMAIGRE, F. P. & ROUSSEAU, G. G. 2002. OC-3, a  
792 novel mammalian member of the ONECUT class of transcription factors. *Biochem*  
793 *Biophys Res Commun*, 292, 848-54.
- 794 WIRTH, T., PRIESS, A., ANNWEILER, A., ZWILLING, S. & OELER, B. 1991. Multiple Oct2  
795 isoforms are generated by alternative splicing. *Nucleic Acids Res*, 19, 43-51.
- 796 ZISKIND-CONHAIM, L. & HOCHMAN, S. 2017. Diversity of molecularly defined spinal  
797 interneurons engaged in mammalian locomotor pattern generation. *J Neurophysiol*,  
798 118, 2956-2974.

799

800

801

802

803 **Figure legends**

804

805 **Figure 1. OC factors are present in multiple subsets of V2 interneurons. (A-I")**

806 Immunolabelings for OC, the V2a generic marker Chx10 and markers of V2a subpopulations  
807 (Francius et al., 2013) on transverse spinal cord sections (brachial or thoracic levels) of e12.5  
808 wild-type mouse embryos. In each figure, the right ventral quadrant of the spinal cord is  
809 shown. Only HNF-6 is detected in Shox2+ V2a cells (arrow in A-C"), whereas the 3 OC are  
810 present in the MafA+ and in the cMaf+ V2a subsets (arrows in D-I"). **(J-L")** Immunolabelings  
811 for OC, the V2b generic marker Gata3 and MafA. The 3 OC proteins are detected in MafA+  
812 V2b interneurons (arrows). **(M-O")** Immunolabelings for OC and the V2c marker Sox1  
813 demonstrate that OC factors are present in a majority of V2c interneurons (arrows). Sox1 in  
814 the ventricular zone labels neural progenitors. Scale bar = 50  $\mu$ m.

815

816 **Figure 2. OC factors regulate the diversification of the V2 interneurons.** Immunolabelings

817 on transverse spinal cord sections (brachial or thoracic levels) of control or *Hnf6*<sup>-/-</sup>;*Oc2*<sup>-/-</sup>  
818 double-mutant embryos. At e12.5 **(A-C)** and e14.5 **(D)**, the production of the V2a Chx10+  
819 interneurons is not altered in the absence of OC factors. Similarly, the number of  
820 Shox2+ V2a is affected neither at e12.5 **(E-G)** nor at e14.5 **(H)**. In contrast, quantitative  
821 analysis of control or *Hnf6*<sup>-/-</sup>;*Oc2*<sup>-/-</sup> littermates at e12.5 **(I-K)** and at e14.5 **(L)** shows reduction  
822 in MafA+ V2a interneurons in double mutants as compared to control embryos. Similarly,  
823 the number of cMaf+ V2a interneurons is significantly reduced at e12.5 **(M-O)** and e14.5 **(P)**  
824 in the absence of OC factors. At e12.5 **(Q-S)** and e14.5 **(T)**, the production of the V2b  
825 interneurons is not affected in *Hnf6*<sup>-/-</sup>;*Oc2*<sup>-/-</sup> embryos. The generation of the MafA+ V2b  
826 interneurons is also unchanged at e12.5 **(U-W)** or e14.5 **(X)**. At e12.5 **(Y-AA)**, the number of  
827 V2c interneurons is dramatically reduced in the absence of OC factors (Sox1 in the  
828 ventricular zone labels neural progenitors). However, this is no longer the case at e14.5 **(BB)**.  
829 Mean values  $\pm$  SEM. \* p $\leq$ 0.05 ; \*\* p $\leq$ 0.01 ; \*\*\* p $\leq$ 0.001. Scale bar = 50  $\mu$ m.

830

831 **Figure 3. OC factors regulate the distribution of V2a interneurons.** Distribution of V2a

832 interneurons on the transverse plane of the spinal cord in control or *Hnf6*<sup>-/-</sup>;*Oc2*<sup>-/-</sup> double-  
833 mutant embryos at brachial, thoracic or lumbar level (only the right hemisection is shown).  
834 Two-dimension distribution graphs (left) show integration of cell distribution from multiple

835 sections of multiple embryos of each genotype. One-dimension graphs (right) compare  
836 density distribution in control (blue) and in double-mutant embryos (red) on the dorso-  
837 ventral (upper) or the medio-lateral (lower) axis of the spinal cord (see Materials and  
838 methods for details). **(A-C)** At e12.5 in control embryos, V2a interneurons distribute in 2  
839 connected clusters, a major central group and a minor medial group, at each level of the  
840 spinal cord. **(D-L)** In mutant embryos, the relative cell distribution between the 2 clusters  
841 seems altered, with relatively less central cells at brachial level and less medial cells at  
842 lumbar levels ( $n=3$ ,  $p\leq 0.001$  at brachial and lumbar levels;  $p=0.17$  at thoracic level). **(M-X)**  
843 Altered V2a distribution on the medio-lateral axis is confirmed at e14.5. **(M-O, S-X)** In  
844 control embryos, the 2 V2a groups coalesce in a more evenly-distributed population that  
845 occupied ~70% of the medio-lateral axis. **(P-X)** In mutant embryos, V2a interneurons remain  
846 segregated into 2 distinct, although connected, clusters with a majority of cells in medial  
847 position ( $n=3$ ,  $p\leq 0.001$ ).

848

849 **Figure 4. OC factors regulate the distribution of V2b interneurons.** **(A-C)** At e12.5 in control  
850 embryos, V2b cells are distributed in a major central (brachial level) or lateral (thoracic and  
851 lumbar levels) cluster with minor subsets located more medially (arrows) or ventrally  
852 (arrowheads). **(D-L)** In OC mutant embryos at e12.5, the major population remains more  
853 compact, more centrally located and slightly more ventral. In addition, the ventral V2b  
854 subset is significantly depleted (asterisks;  $n=3$ ,  $p\leq 0.001$  at brachial and thoracic levels;  
855  $p=0.31$  at brachial level). **(M-X)** Consistently, at e14.5, V2b interneurons in the central  
856 cluster are more compact in the absence of OC factors at thoracic level, and a small  
857 contingent of V2b migrating towards the medio-dorsal spinal cord in control embryos  
858 (arrowheads) is missing in OC mutant littermates ( $n=3$ ,  $p\leq 0.001$  at thoracic level;  $p=0.31$  and  
859  $0.80$  at thoracic and lumbar levels, respectively).

860

861 **Figure 5. OC factors control expression of spinal cord-specific isoforms of *Pou2f2*.** **(A)** The  
862 different *Pou2f2* isoforms present in the B cells (B\_*Pou2f2*) are characterized by invariant  
863 exons (dark grey) and alternative exons 4, 5, 8, 14 or 16 (light grey). They contain a POU-  
864 specific domain (light green) encoded by exons 9 and 10 and a POU-type homeodomain  
865 (dark green) encoded by exons 11 and 12. The 4 spinal *Pou2f2* isoforms (S\_*Pou2f2*.1 to  
866 S\_*Pou2f2*.4) (identified in the spinal cord) are characterized by a distinct exon 1 (E1X in light

867 orange), an additional exon E5b (dark orange) and alternative exons E1b and 4 (medium  
868 orange and light grey, respectively). The presence of E1b disrupts the reading frame and  
869 imposes the use of the ATG located in E2a, whereas the absence of E1b leaves open the use  
870 of the ATG located in E1X. The regions corresponding to the generic or to the E5b *in situ*  
871 hybridization probes are indicated. **(B-E)** Quantification of spinal *Pou2f2* or B-cell isoforms by  
872 RT-qPCR. **(B)** In control spinal cords, spinal *Pou2f2* isoforms are >30-fold more abundant  
873 than B-cell isoforms. **(C)** B cell *Pou2f2* isoforms barely trend to increase in the absence of OC  
874 factors. **(D)** In contrast, spinal *Pou2f2* isoforms are 2.6-fold overexpressed in *Hnf6<sup>-/-</sup>;Oc2<sup>-/-</sup>*  
875 spinal cords. **(E)** In double mutant spinal cords, spinal *Pou2f2* isoforms are >60-fold more  
876 abundant than B-cell isoforms. **(F-I)** *In situ* hybridization labelings on transverse sections  
877 (brachial level) of control or *Hnf6<sup>-/-</sup>;Oc2<sup>-/-</sup>* spinal cords at e11.5 with **(F-G)** a generic *Pou2f2*  
878 probe complementary to spinal and to B-cell isoforms **(A)** or **(H-I)** a spinal isoform-specific  
879 probe corresponding only to exon E5b **(A)**. **(F, H)** In control embryos, *Pou2f2* is strongly  
880 expressed in ventral and in dorsal interneuron populations, and more weakly in the ventral  
881 motor neuron area. **(G, I)** In OC mutant embryos, *Pou2f2* is upregulated in interneuron  
882 populations and its expression is expanded in ventral populations (arrowheads) and in the  
883 motor neurons (arrows). \*  $p \leq 0.05$  ; \*\*  $p \leq 0.01$ . Scale bars = 50  $\mu\text{m}$ .

884

885 **Figure 6. The *Pou2f2*+ V2a interneurons are mislocated in the absence of OC factors. (A-F)**

886 Immunolabelings and quantification of *Pou2f2*+ V2a interneurons in control or *Hnf6<sup>-/-</sup>;Oc2<sup>-/-</sup>*  
887 mutant embryos. At e12.5 **(A-B)** and e14.5 **(C-D)**, *Pou2f2* is detected in V2a *Chx10*<sup>+</sup>  
888 interneurons, and the number of *Pou2f2*-containing *Chx10*<sup>+</sup> cells trends to increase but is  
889 not significantly different in the absence of OC factors **(E-F)**. **(G-DD)** Distribution of *Pou2f2*+  
890 V2a interneurons on the transverse plane of the spinal cord in control or *Hnf6<sup>-/-</sup>;Oc2<sup>-/-</sup>*  
891 double-mutant embryos. One-dimension graphs (lower) show density distribution on the  
892 dorso-ventral (left) or the medio-lateral (right) axis of the spinal cord. **(G-R)** At e12.5, cells in  
893 the central clusters are slightly reduced at brachial and at thoracic levels in the absence of  
894 OC factors ( $n=3$ ,  $p \leq 0.001$  at brachial and thoracic levels;  $p=0.41$  at lumbar level). **(S-DD)** At  
895 e14.5, a vast majority of V2a containing *Pou2f2* settles in a more medial position in *Hnf6<sup>-/-</sup>*  
896 *;Oc2<sup>-/-</sup>* spinal cords ( $n=3$ ,  $p \leq 0.001$ ). Mean values  $\pm$  SEM. Scale bar = 50  $\mu\text{m}$ .

897

898 **Figure 7. The *Pou2f2*<sup>+</sup> V2b interneurons are mislocated in the absence of OC factors. (A-F)**  
899 Immunolabelings and quantification of *Pou2f2*<sup>+</sup> V2b interneurons in control or *Hnf6*<sup>-/-</sup>;*Oc2*<sup>-/-</sup>  
900 mutant embryos. At e12.5 (A-B) and e14.5 (C-D), *Pou2f2* is present in V2b *Gata3*<sup>+</sup>  
901 interneurons, but the number of *Pou2f2*<sup>+</sup> V2b cells was not significantly increased in the  
902 absence of OC factors (E-F). (G-DD) Distribution of *Pou2f2*<sup>+</sup> V2b interneurons on the  
903 transverse plane of the spinal cord in control or *Hnf6*<sup>-/-</sup>;*Oc2*<sup>-/-</sup> double-mutant embryos. One-  
904 dimension graphs (lower) show density distribution on the dorso-ventral (left) or the medio-  
905 lateral (right) axis of the spinal cord. (G-R) At e12.5, *Pou2f2*-containing V2b are more central  
906 and slightly more ventral in the absence of OC factors (n=3, p≤0.001). (S-DD) At e14.5, this  
907 subset of V2b interneurons is more clustered on the medio-lateral axis in *Hnf6*<sup>-/-</sup>;*Oc2*<sup>-/-</sup> spinal  
908 cords (n=3, p≤0.001). Mean values ± SEM. Scale bar = 50 μm.

909  
910 **Figure 8. V2 interneuron distribution is altered after misexpression of *Pou2f2*.**  
911 Overexpression of *Pou2f2* in chick embryonic spinal cord after electroporation at HH14-16  
912 and immunolabelings 72 hours after electroporation. (A-F) At HH27-28, *Pou2f2*  
913 overexpression does not impact the number of V2a (E) or V2b (F) interneurons. In contrast,  
914 it alters V2 distribution. (G-J) In control spinal cord, V2a interneurons are distributed in two  
915 closely connected clusters on the medio-lateral axis of the neuroepithelium. In  
916 electroporated spinal cord, lateral migration is increased and a majority of V2a interneurons  
917 are clustered in a single central group with ectopic lateral extensions (arrows; n=3, p≤0.001).  
918 (K-N) In control spinal cord, V2b are distributed in two groups along the medio-lateral axis  
919 with a majority of cells in the lateral cluster. In electroporated spinal cord, the V2b  
920 interneurons are equally distributed between these 2 clusters (n=3, p≤0.001). Mean values ±  
921 SEM. Scale bar = 50 μm.

922  
923 **Figure 9. *Pou2f2* regulate the distribution of V2a interneurons. (A-C)** Immunolabelings and  
924 quantification of V2a interneurons in control or *Pou2f2*<sup>-/-</sup> mutant embryos. At e12.5, the  
925 production of the *Chx10*<sup>+</sup> V2a interneurons is not altered in absence of *Pou2f2*. (D-O)  
926 Distribution of V2a and *Shox2*<sup>+</sup> V2a interneurons on the transverse plane of the spinal cord  
927 in control or *Pou2f2*<sup>-/-</sup> mutant embryos. One-dimension graphs (right) show density  
928 distribution on the dorso-ventral (upper) or the medio-lateral (lower) axis of the spinal cord.  
929 V2a distribution is affected in *Pou2f2*<sup>-/-</sup> mutants. As compared to the two V2a clusters

930 observed in control embryos, Chx10<sup>+</sup> cells are relatively more abundant in the medial cluster  
931 in *Pou2f2*<sup>-/-</sup> mutant embryos (n=3, p≤0.001). Mean values ± SEM. Scale bar = 50 μm.

932

933 **Figure 10. Pou2f2 regulate the distribution of V2b interneurons. (A-C)** Immunolabelings and  
934 quantification of V2b interneurons in control or *Pou2f2*<sup>-/-</sup> mutant embryos. At e12.5, the  
935 production of the Gata3<sup>+</sup> V2b interneurons is not affected by the absence of Pou2f2. **(D-O)**  
936 Distribution of V2b interneurons on the transverse plane of the spinal cord in control or  
937 *Pou2f2*<sup>-/-</sup> mutant embryos. One-dimension graphs (right) show density distribution on the  
938 dorso-ventral (upper) or the medio-lateral (lower) axis of the spinal cord. The distribution of  
939 V2b cells is altered in *Pou2f2*<sup>-/-</sup> mutants, as V2b interneurons remained more medial at  
940 thoracic level and segregated more extensively on the medio-lateral axis at lumbar level  
941 (n=3, p≤0.001). Mean values ± SEM. Scale bar = 50 μm.

942

943

#### 944 **Supplementary figure legends**

945

946 **Supplementary Figure S1. OC factors regulate the diversification of the V2 interneurons.**  
947 **(A-H'')** Immunolabelings of the V2a generic marker Chx10 and markers of V2a  
948 subpopulations on transverse spinal cord sections (brachial or thoracic levels) control or  
949 *Hnf6*<sup>-/-</sup>;*Oc2*<sup>-/-</sup> mutant embryos at e14.5. Quantifications are shown in Fig 1. V2a **(A-B)**, Shox2<sup>+</sup>  
950 V2a (arrows) and V2d interneurons **(C- D'')**, arrowheads) are present in both control and  
951 double mutant embryos. **(E-E'')** MafA is present in a V2a subpopulation in control embryos  
952 (arrows), **(F-F'')** but is not detected in Chx10<sup>+</sup> cells in the absence of OC factors. **(G-G'')**  
953 Similarly, cMaf is present in a subpopulation of V2a interneurons in control embryos  
954 (arrows), **(H-H'')** which is not the case in *Hnf6*<sup>-/-</sup>;*Oc2*<sup>-/-</sup> embryos. **(I-L'')** Immunolabelings of  
955 the V2b generic marker Gata3 and the marker of V2b subpopulation, MafA. V2b **(I-J'')** and  
956 MafA<sup>+</sup> V2b **(K-L'')**, arrows) interneurons are present in control and in *Hnf6*<sup>-/-</sup>;*Oc2*<sup>-/-</sup> embryos.  
957 **(M-N)** The number of V2c interneurons is unchanged is similarly detected in *Hnf6*<sup>-/-</sup>;*Oc2*<sup>-/-</sup>  
958 embryos as compared to control embryos (delineated cells). Sox1 in the ventricular zone  
959 labels neural progenitors. Scale bar = 50 μm.

960

961 **Supplementary Figure S2. Pou2f2 RT-PCR experiments and sequencing of exon 1b and**  
962 **exon 5b of the spinal Pou2f2 isoforms.** Composite assembly of electrophoresis images of  
963 RT-PCR amplification products for *Pou2f2* isoform sequences on embryonic spinal cord or B-  
964 cell RNA samples. Water was used as a negative control (Ctl-). **(A)** Amplifications from exon 1  
965 (E1) to E6 on embryonic spinal cord RNA samples (asterisk) fail to amplify the RNA isoforms  
966 detected in B cell samples. In contrast, amplifications from E7 to E9, from E10 to E12 and  
967 from E13 to E17 show at least one similar amplicon in spinal cord samples and in B cell  
968 samples. **(B)** Amplification from E1 (other forward primer) to E7 also fails to amplify *Pou2f2*  
969 spinal cord isoforms. In contrast, amplifications from E2, 3, 4 and 5 to E7 produce  
970 systematically longer amplicons in spinal cord samples (arrowheads) as compared to B cell  
971 samples. The E6 to E7 amplification is similar in both samples. **(C)** Amplifications from E1X  
972 (present in the X6 sequence) to E3 do not produce amplicon in B-cell samples (asterisk).  
973 Amplifications from E1X to E3 or to E5b on spinal cord samples systematically produce 2  
974 amplicons (arrowheads). Amplifications of the E5b exon sequence, from E3 to E5b and from  
975 E5b to E7 produce expected amplicons in spinal cord samples. **(D)** Comparison of exon 1b  
976 and exon 5b sequences in the predicted X6 sequence and the sequenced embryonic spinal  
977 cord *Pou2f2* isoforms. Sequences of E1X, E2a and E5b exons align (100% identity) with the  
978 predicted X6 sequence. Sequence of the additional alternative exon 1b is shown. SD = Size  
979 standard, E = Exon, SC = Embryonic spinal cord, B = B lymphocytes.

980

981 **Supplementary Figure S3. The number of Pou2f2+Shox2+ V2a interneurons is normal in**  
982 ***Hnf6<sup>-/-</sup>;Oc2<sup>-/-</sup>* mutant embryos.** Immunolabelings on transverse spinal cord sections (brachial  
983 or thoracic levels) of control or *Hnf6<sup>-/-</sup>;Oc2<sup>-/-</sup>* mutant embryos. At e12.5 **(A-C)** and at e14.5  
984 **(D-F)**, the number of V2a containing Shox2 and Pou2f2 is unchanged in the absence of OC  
985 factors. Mean values  $\pm$  SEM. Scale bar = 50  $\mu$ m.

986

987 **Supplementary Figure S4. Efficacy of pCMV-eGFP and pCMV-Pou2f2 co-electroporation in**  
988 **the chicken embryonic spinal cord.** **(A-C)** eGFP (green, **B**) and Pou2f2 (red, **C**) are present in  
989 a vast majority of cells along the dorso-ventral axis of the spinal cord. Scale bar = 50  $\mu$ m.

990

991 **Supplementary Figure S5. The number of MafA+ or cMaf+ V2a interneurons is normal in**  
992 ***Pou2f2<sup>-/-</sup>* mutant spinal cords.** Immunolabelings on transverse spinal cord sections (brachial

993 or thoracic levels) of control or *Pou2f2*<sup>-/-</sup> mutant embryos at e12.5. **(A-F)** Absence of Pou2f2  
994 does not impact on the number of Shox2+ **(A-C)**, cMaf+ **(D-F)** or MafA+ **(G-I)** V2a  
995 interneurons. Mean values ± SEM. Scale bar = 50 μm.

996

997 **Supplementary Figure S6. The number of MafA-positive V2b interneurons or of the V2c**  
998 **interneurons is normal in *Pou2f2*<sup>-/-</sup> mutant spinal cords.** Immunolabelings on transverse  
999 spinal cord sections (brachial or thoracic levels) of control or *Pou2f2*<sup>-/-</sup> mutant embryos at  
1000 e12.5. **(A-B, E)** The number of MafA+ V2b interneurons is not significantly altered in the  
1001 absence of Pou2f2. **(C-D, F)** Similarly, the production of V2c interneurons is not affected in  
1002 *Pou2f2* mutants. Mean values ± SEM. Scale bar = 50 μm.

1003



**Table 1. OC factors are present in specific populations and subpopulations of V2 interneurons.**

| <b>V2 – e12.5</b>  |                       |              |             |             |
|--------------------|-----------------------|--------------|-------------|-------------|
| <b>Populations</b> | <b>Subpopulations</b> | <b>HNF-6</b> | <b>OC-2</b> | <b>OC-3</b> |
| V2a – Chx10        |                       | +            | +           | +           |
|                    | Shox2                 | +            | -           | -           |
|                    | MafA                  | +            | +           | +           |
|                    | cMaf                  | +            | +           | +           |
|                    | Bhlhb5                | -            | -           | -           |
|                    | Prdm8                 | -            | -           | -           |
| V2b – Gata3        |                       | +            | +           | +           |
|                    | MafA                  | +            | +           | +           |
|                    | MafB                  | -            | -           | -           |
|                    | Bhlhb5                | -            | -           | -           |
|                    | Prdm8                 | -            | -           | -           |
| V2c – Sox1         |                       | +            | +           | +           |
| V2d – Shox2        |                       | -            | -           | -           |

The V2 populations, including V2a, V2b, V2c and V2d, are subdivided in smaller subpopulations characterized by differential expression of transcription factors (Francius et al. 2013). OC factors are detected in specific populations and subpopulations of V2 interneurons.

**Table 2. Pou2f2 isoforms in the developing spinal cord are different from B-cell isoforms.**

| <b>Amplification</b> | <b>Expected sizes</b>      | <b>B cells</b>             | <b>Control spinal cord</b>               |
|----------------------|----------------------------|----------------------------|------------------------------------------|
| <b>E1 → E6</b>       | 272 bp<br>390 bp<br>456 bp | 272 bp<br>390 bp<br>456 bp | No amplification                         |
| <b>E7 → E9</b>       | 174 bp<br>222 bp           | 174 bp<br>222 bp           | 174 bp                                   |
| <b>E10 → E12</b>     | 452 bp                     | 452 bp                     | 452 bp                                   |
| <b>E13 → E17</b>     | 160 bp<br>296 bp<br>370 bp | 160 bp<br>296 bp<br>370 bp | 370 bp                                   |
| <b>E1 → E7</b>       | 348bp<br>466 bp<br>532 bp  | 466 bp<br>532 bp           | No amplification                         |
| <b>E2 → E7</b>       | 284 bp<br>402 bp<br>468 bp | 402 bp<br>468 bp           | ~ 680 bp<br>~ 750 bp                     |
| <b>E3 → E6</b>       | 154 bp<br>272 bp<br>378 bp | 154 bp<br>272 bp<br>378 bp | 272 bp<br>378 bp<br>~ 550 bp<br>~ 650 bp |
| <b>E4 → E7</b>       | 340 bp                     | 340 bp                     | ~ 600 bp                                 |
| <b>E5 → E7</b>       | 201 bp                     | 201 bp                     | 201 bp<br>~ 480 bp                       |
| <b>E6 → E7</b>       | 160 bp                     | 160 bp                     | 160 bp                                   |
| <b>E1X → E3</b>      | 152 bp                     | No amplification           | 152 bp<br>~ 220 bp                       |
| <b>E1X → E5b</b>     | 554 bp<br>620 bp           | N.D                        | 554 bp<br>620 bp                         |
| <b>E5b</b>           | 234 bp                     | N.D                        | 234 bp                                   |
| <b>E3 → E5b</b>      | 429 bp<br>495 bp           | N.D                        | 429 bp<br>495 bp                         |
| <b>E5b → E7</b>      | 416 bp                     | N.D                        | 416 bp                                   |

Regions covering B lymphocytes or predicted Pou2f2 isoforms (exons E1 or E1X to E17) were amplified by RT-PCR from B lymphocyte or embryonic spinal cord RNA.

Orange cells = unexpected results.

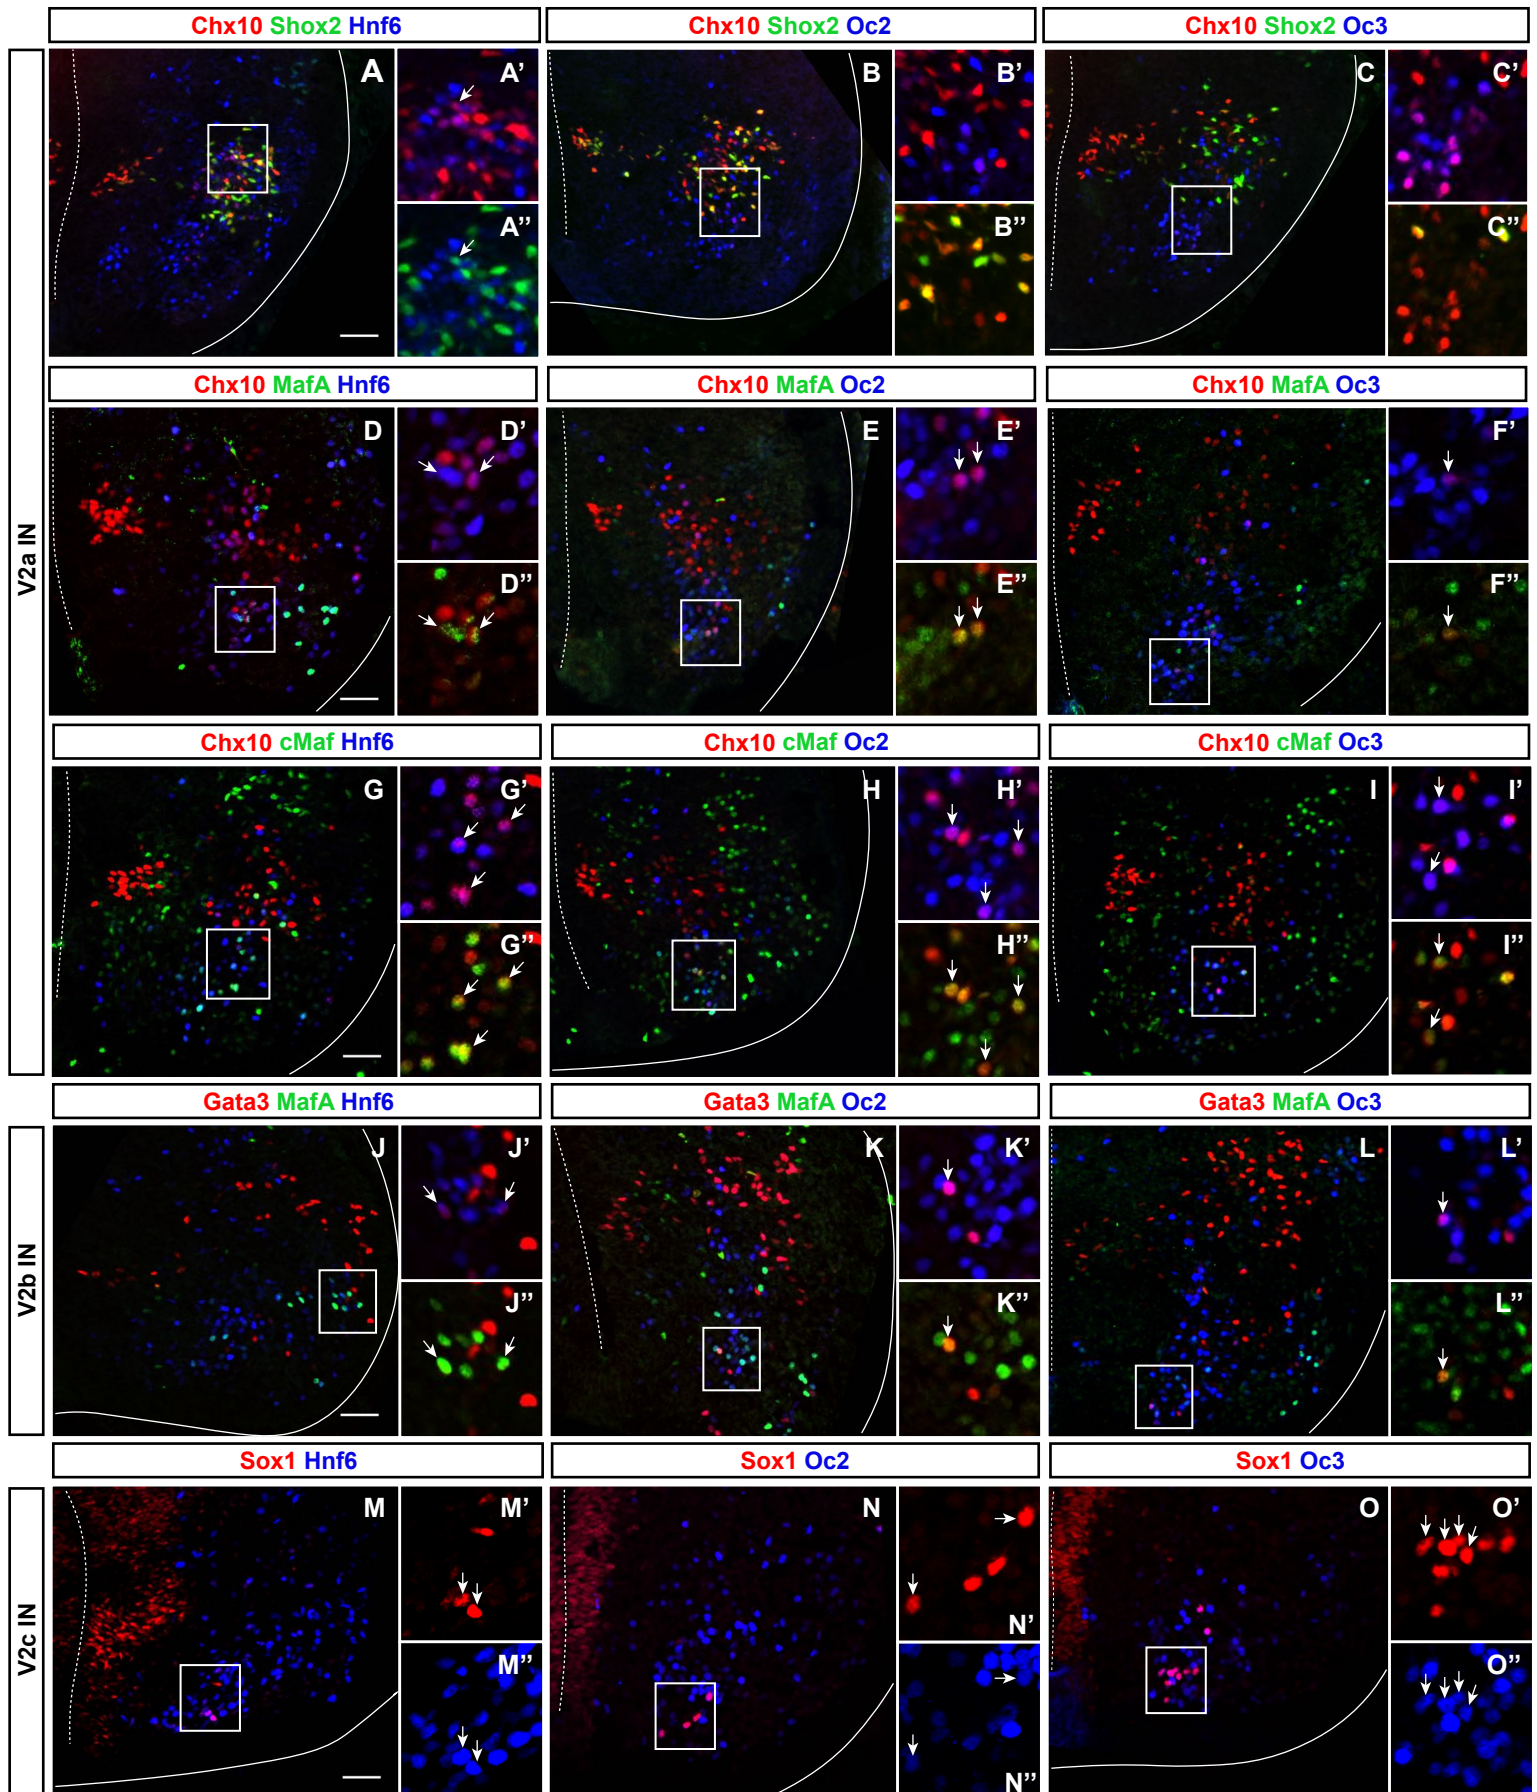

Harris A. et al, Figure 1

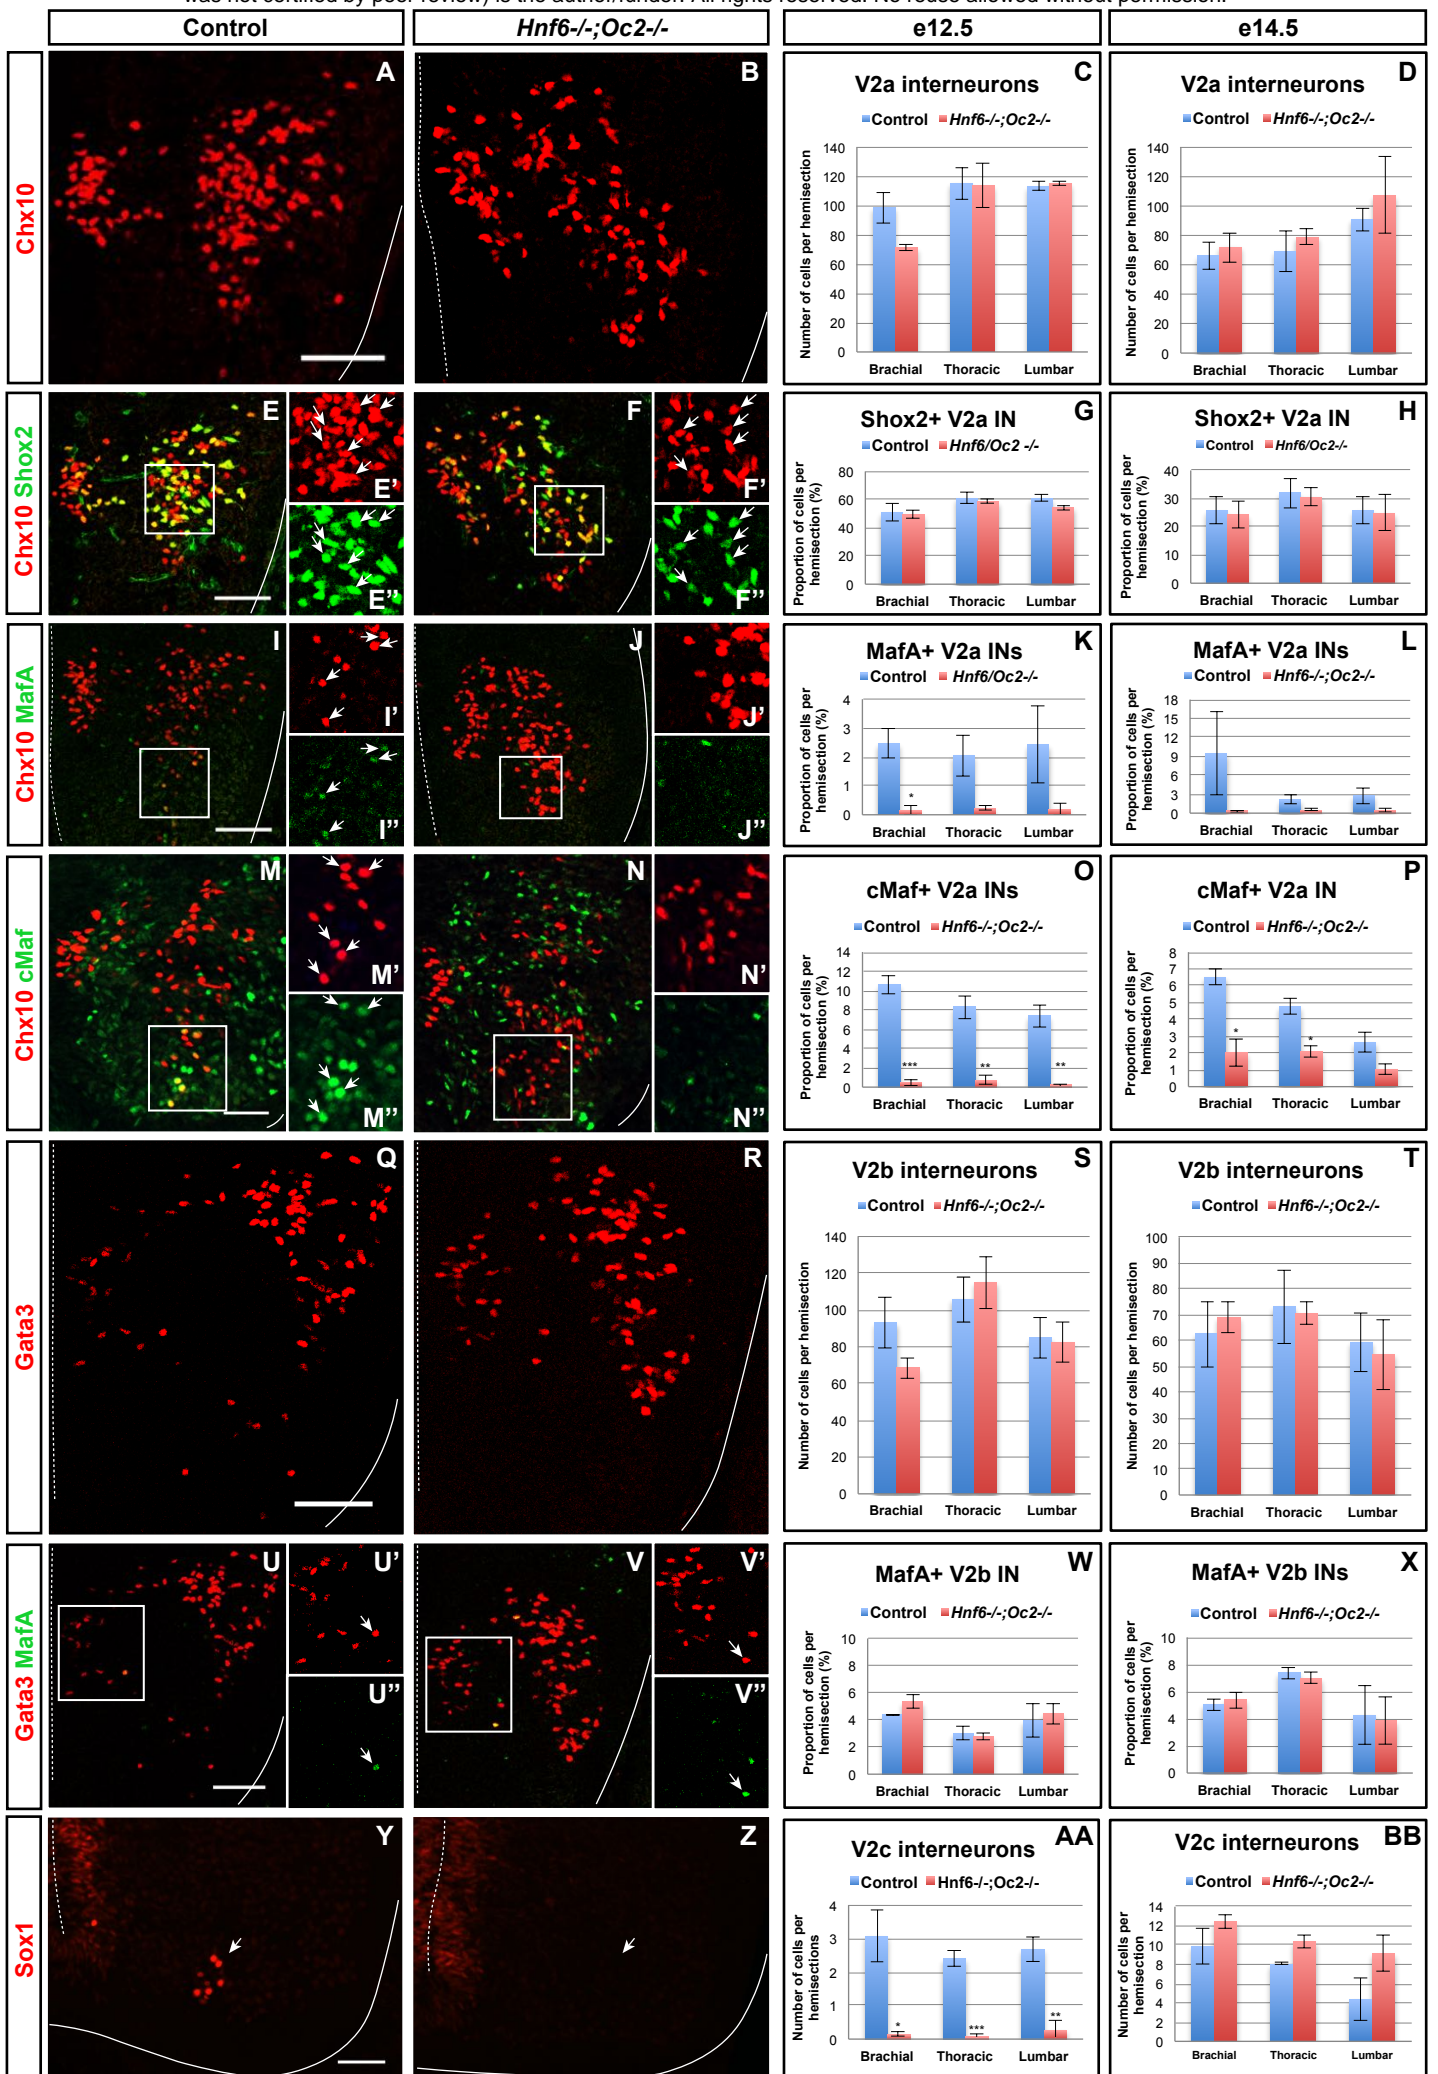

Harris A. et al., Figure 2

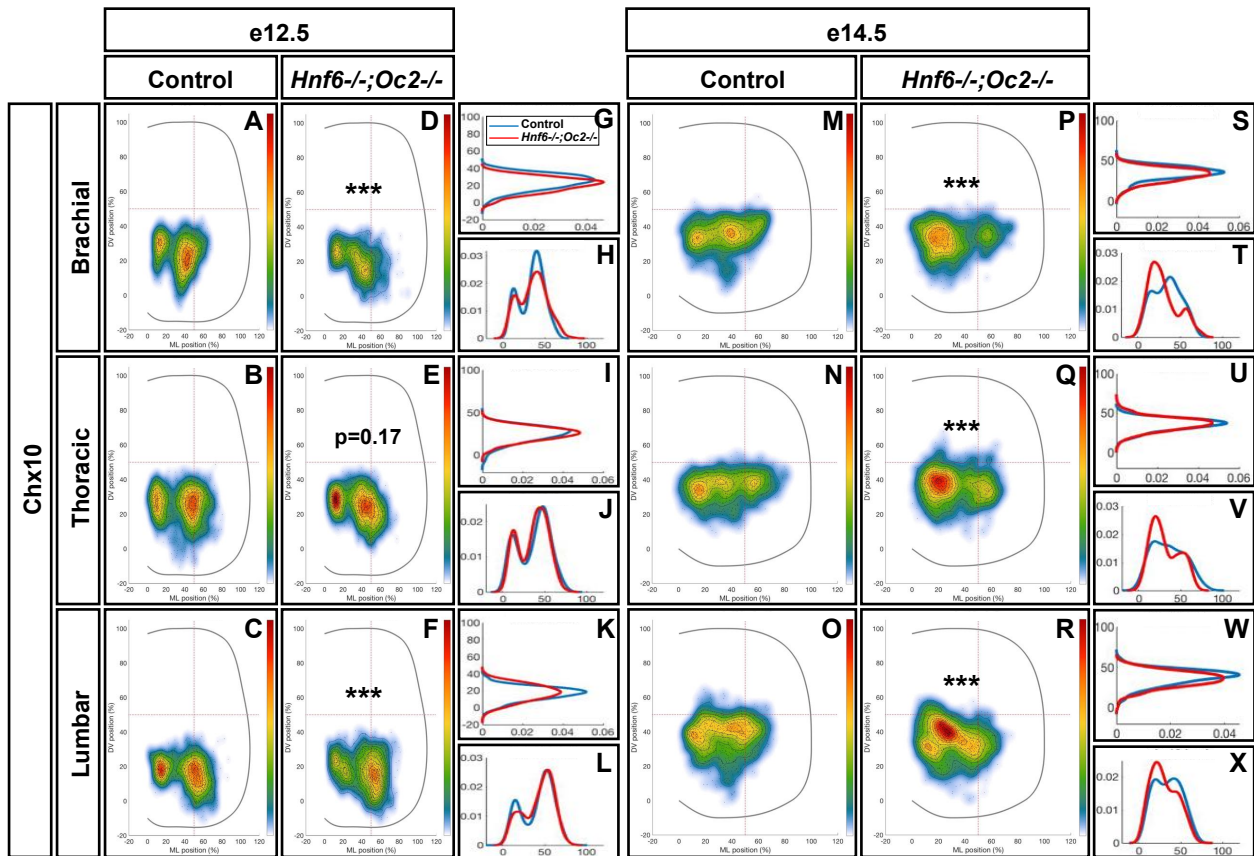

Harris A. et al, Figure 3

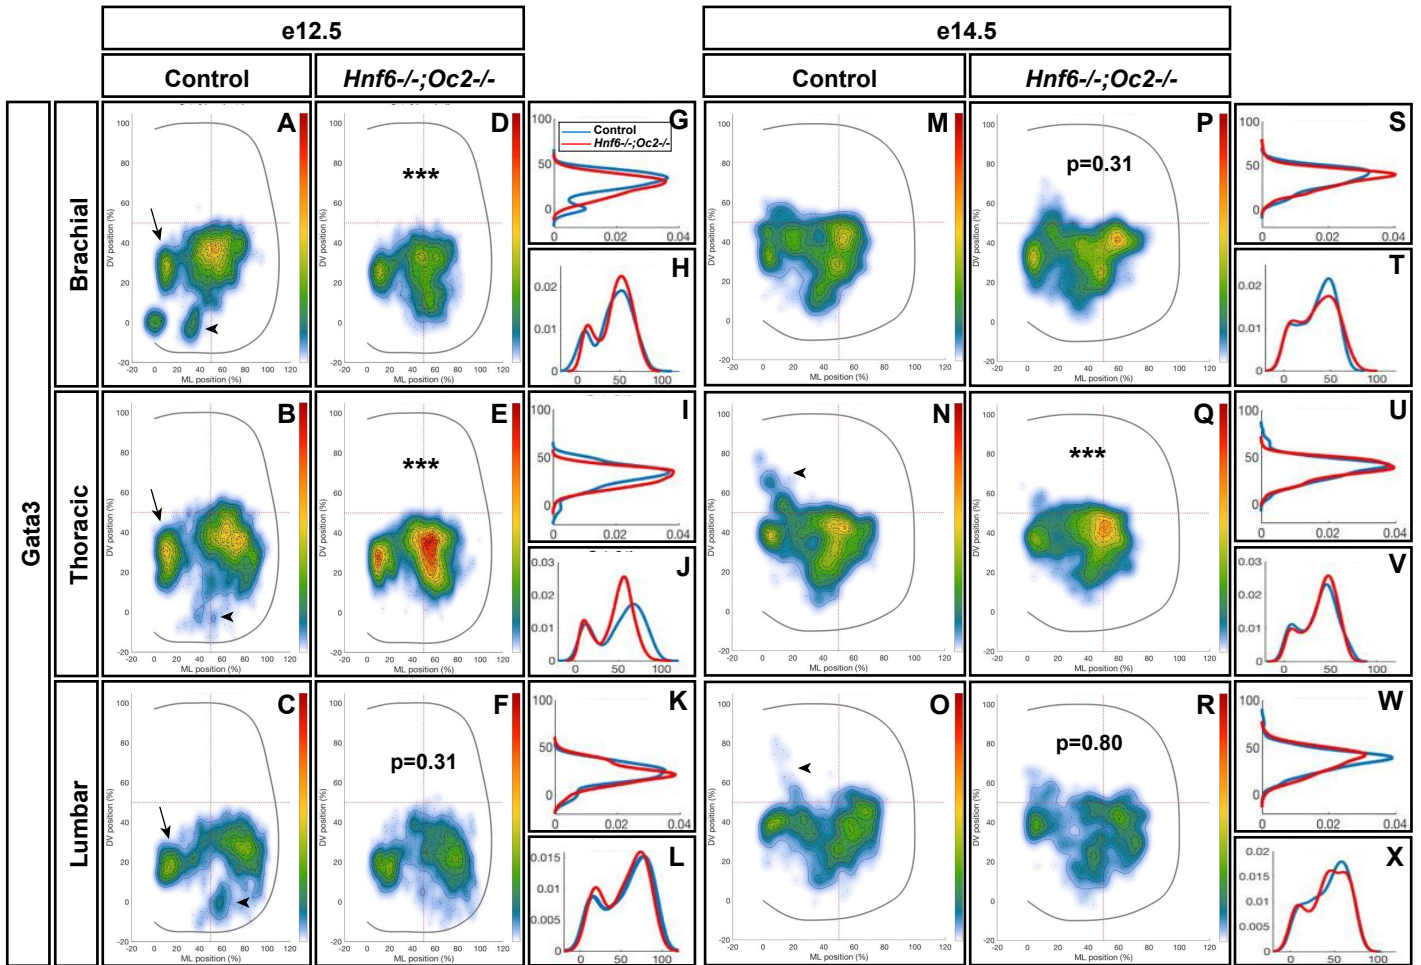

Harris A. et al, Figure 4

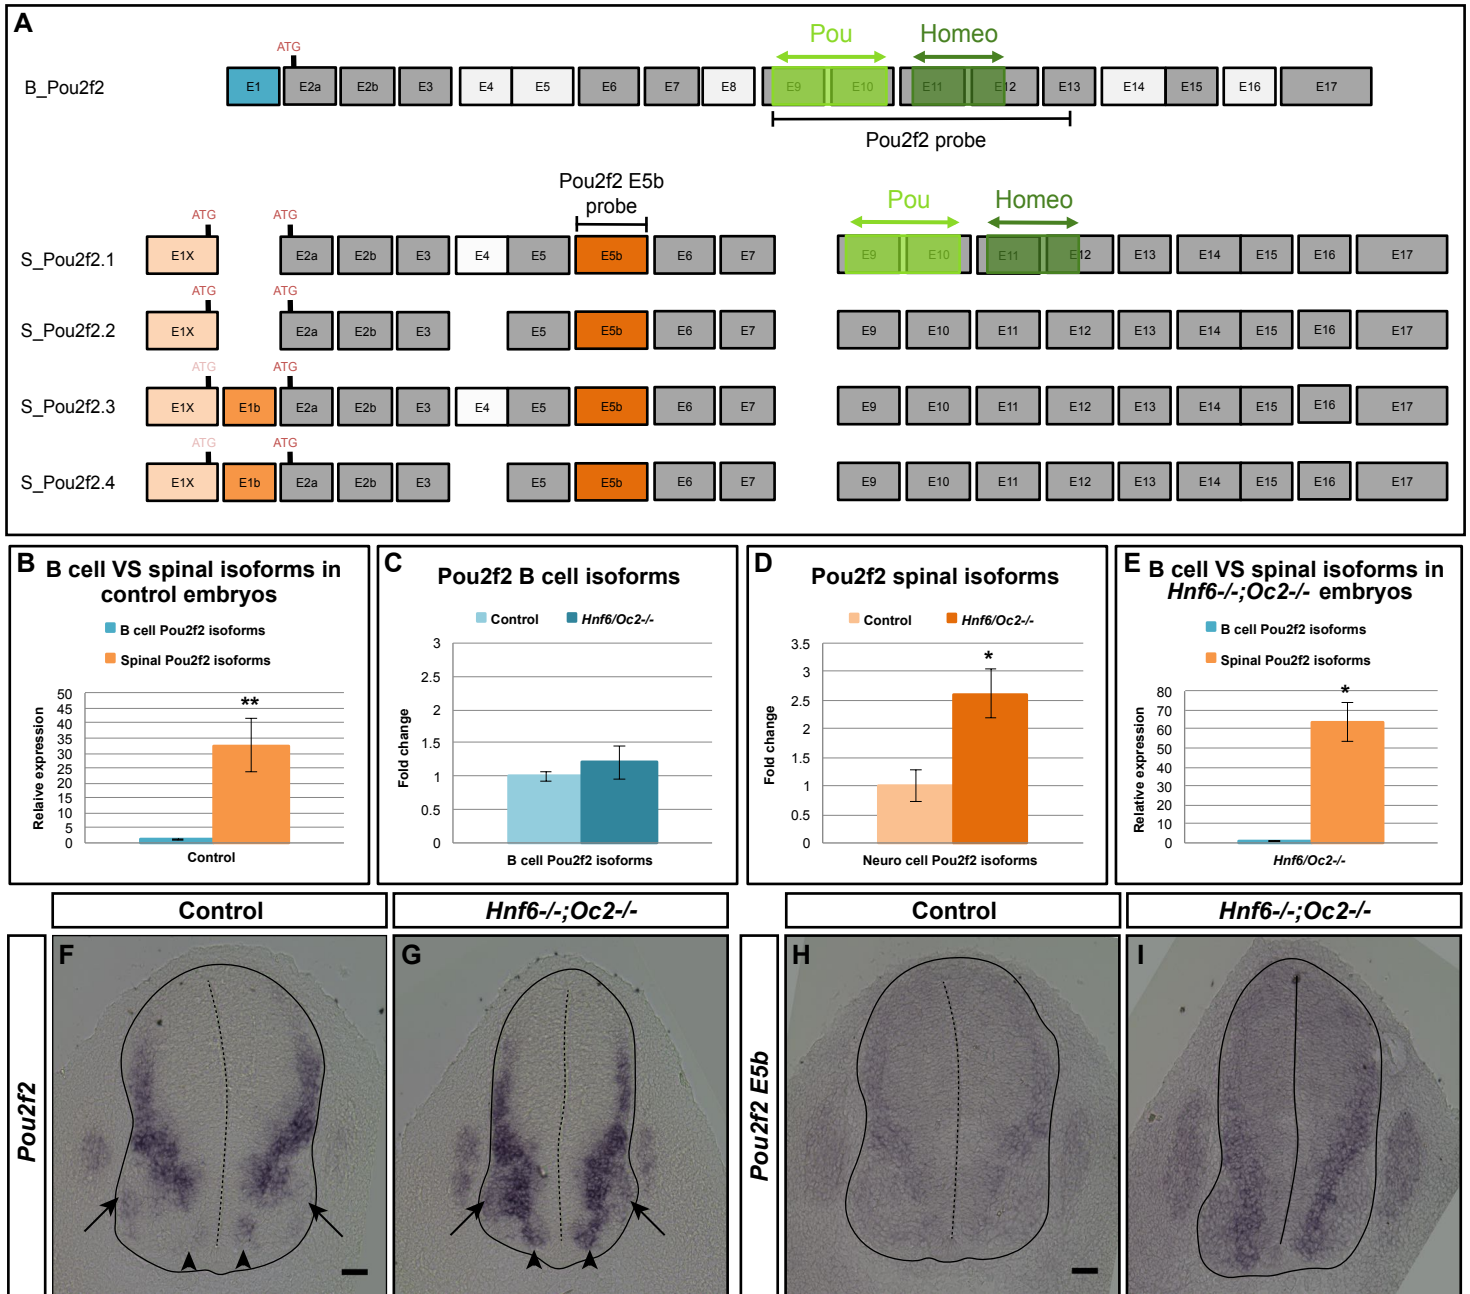

Harris A. et al, Figure 5

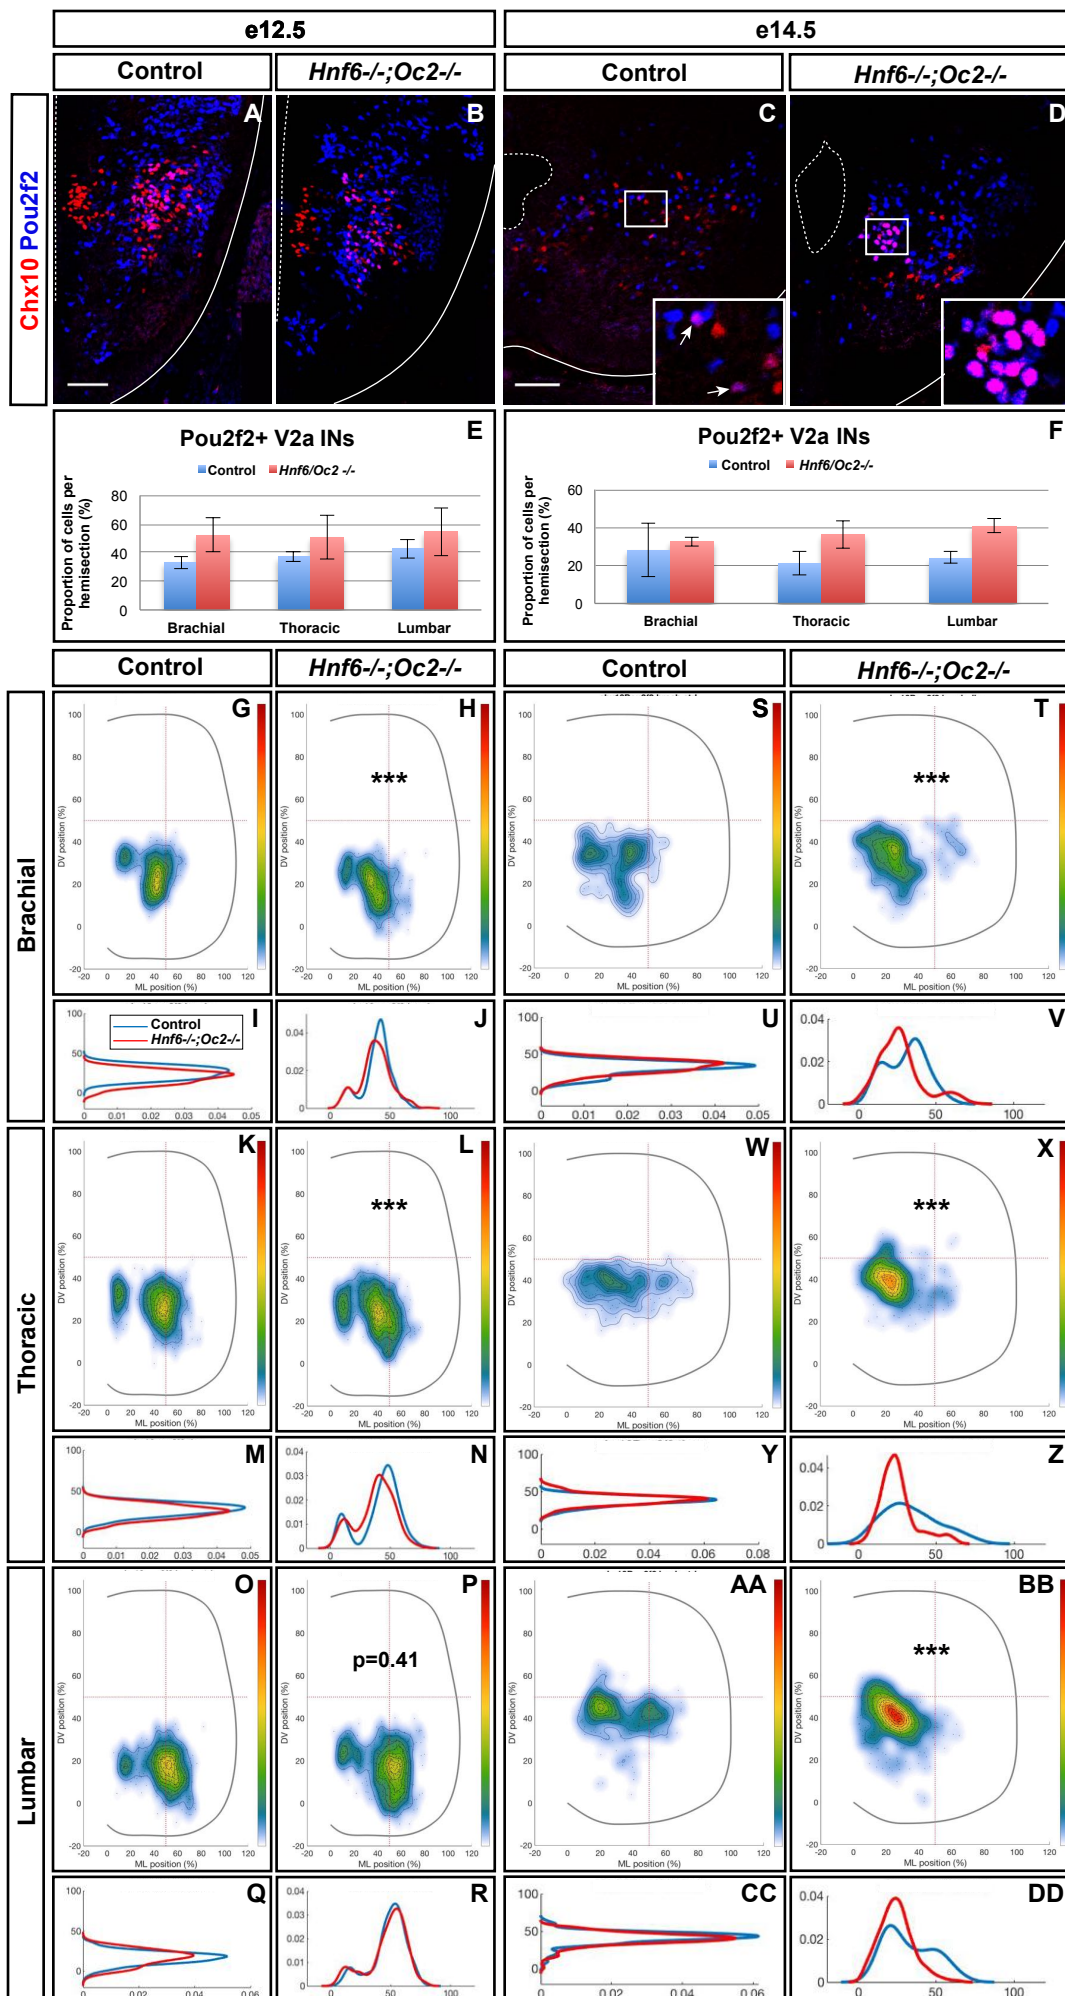

Harris A. et al, Figure 6



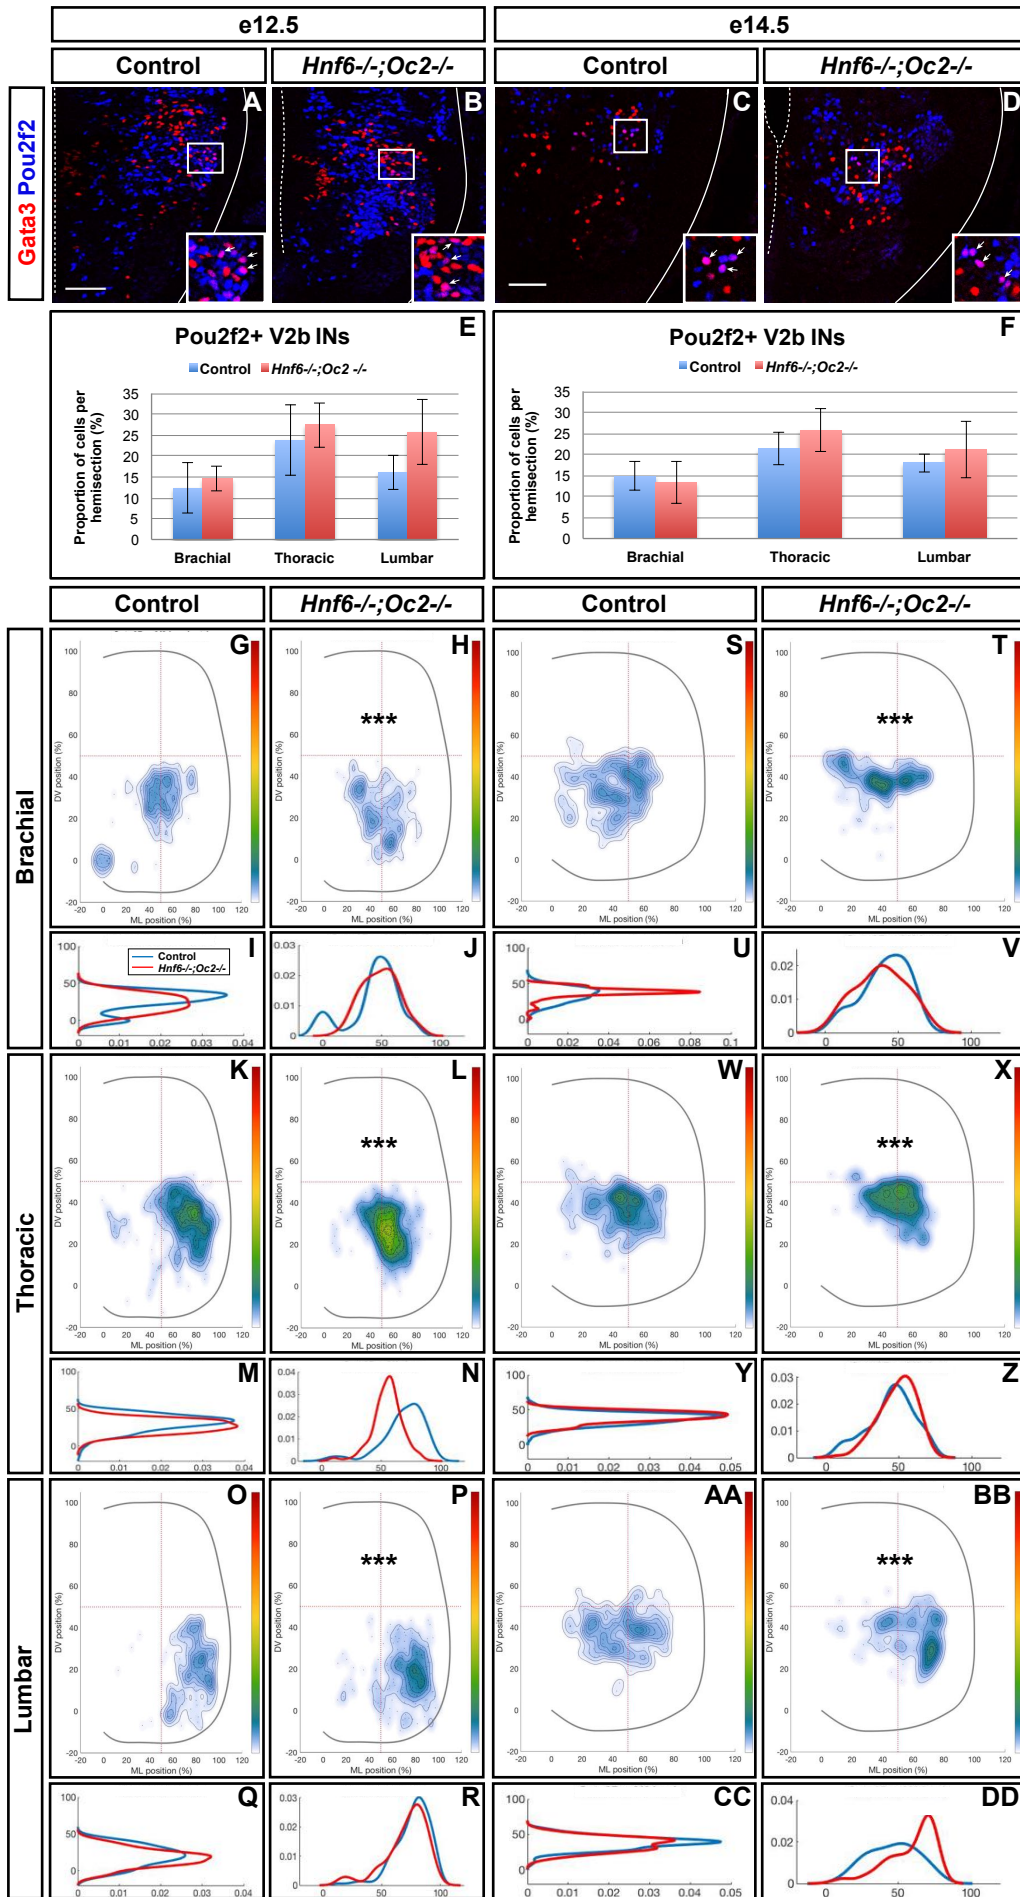

Harris A. et al, Figure 7

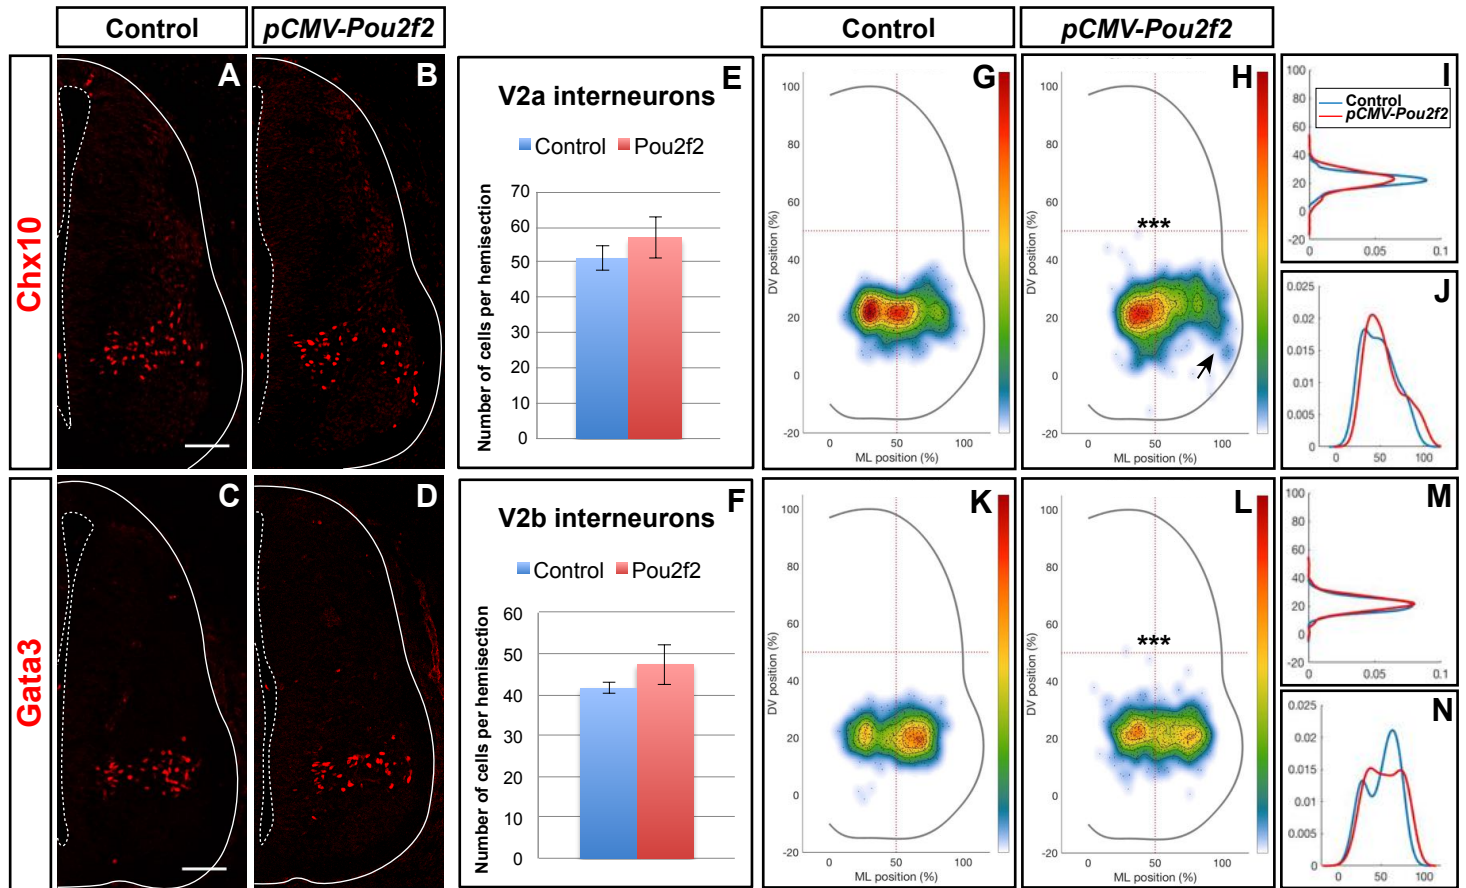

Harris A. et al., Figure 8

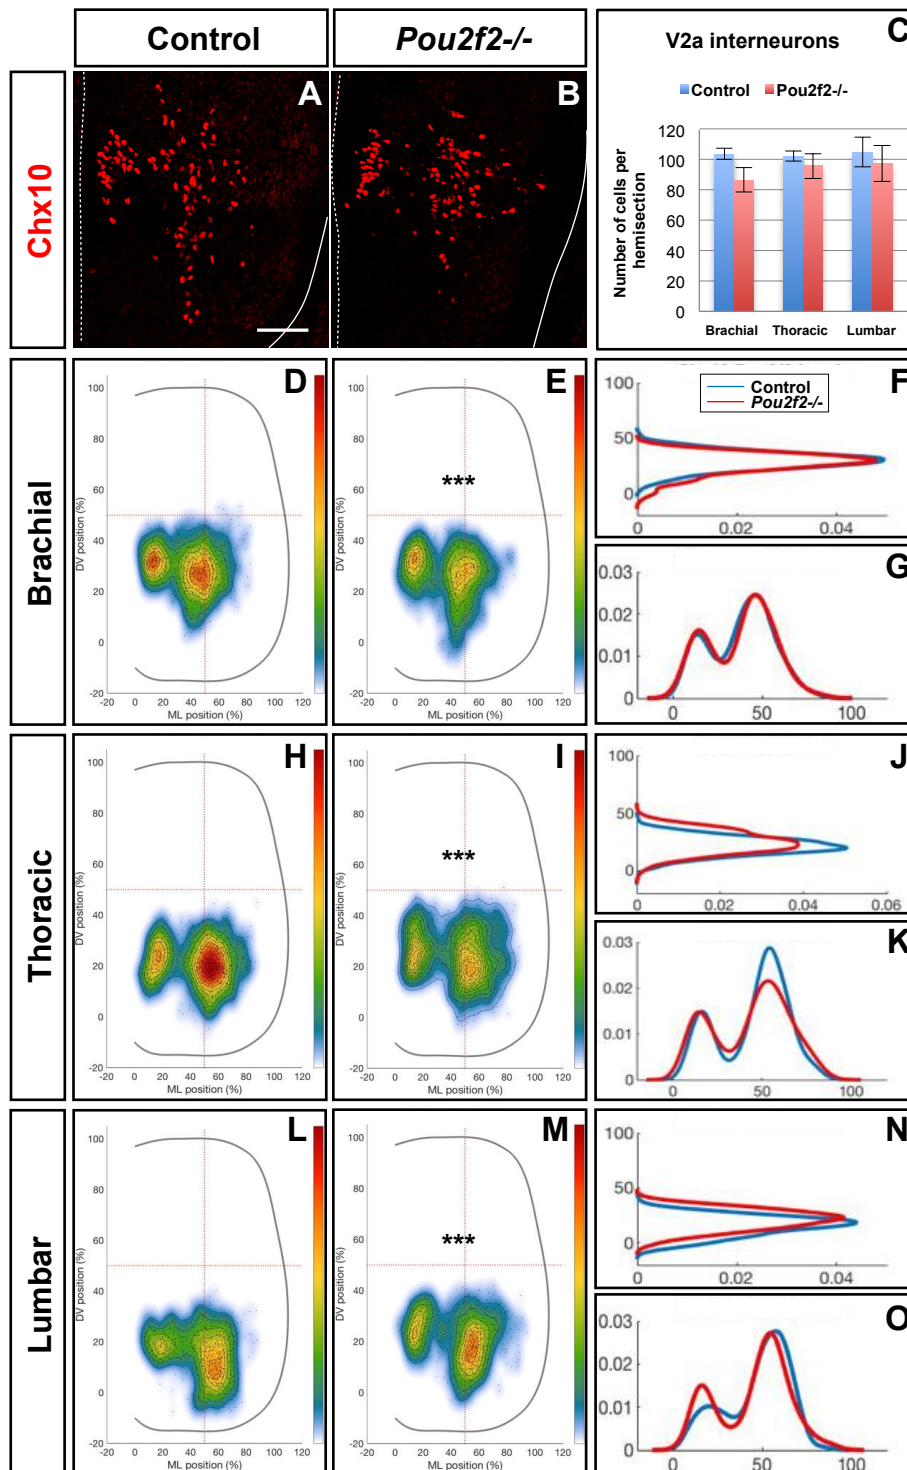

Harris A. et al, Figure 9

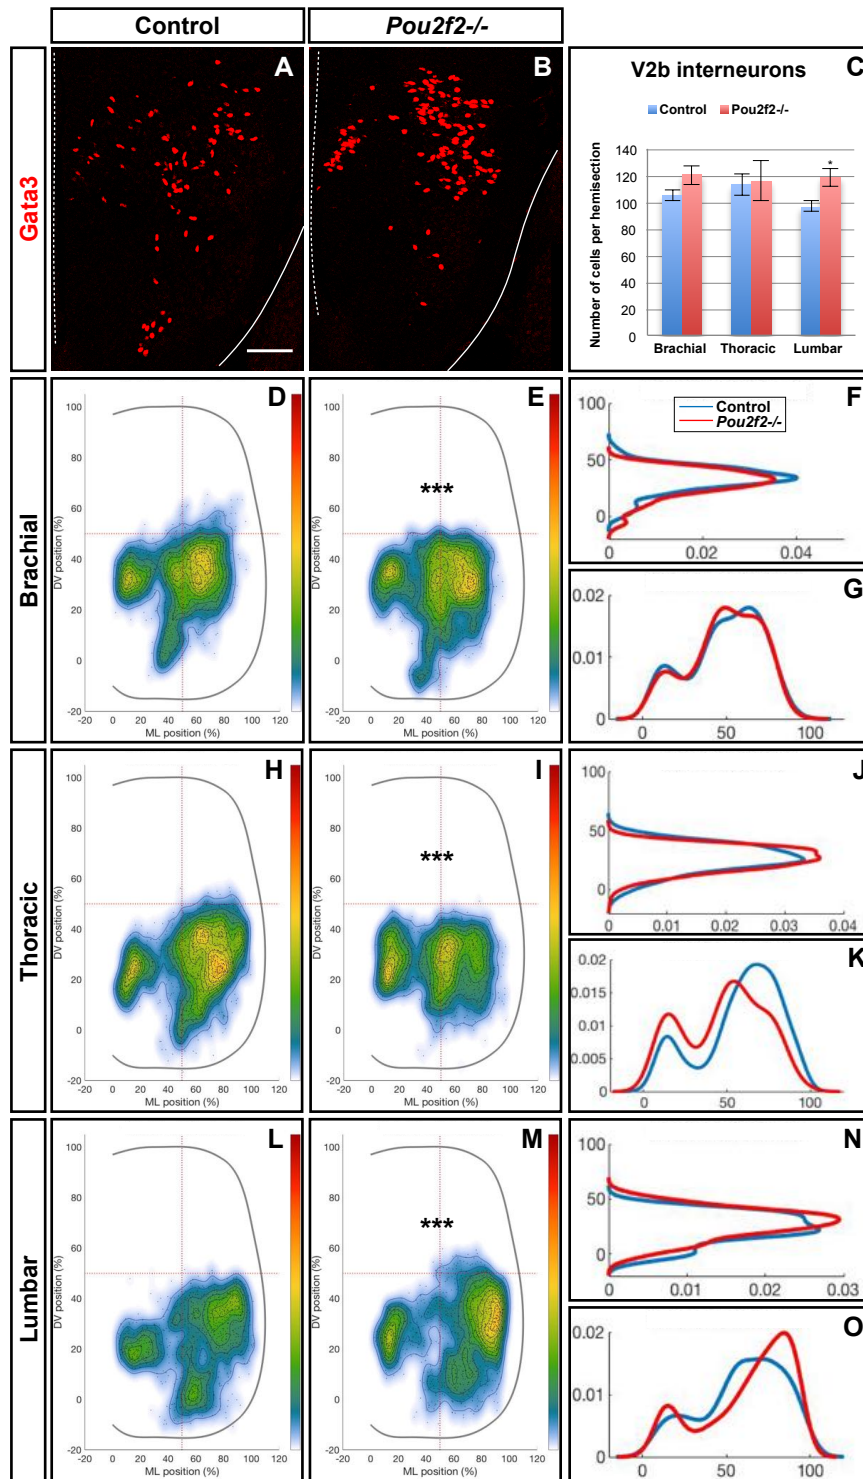

Harris A. et al, Figure 10

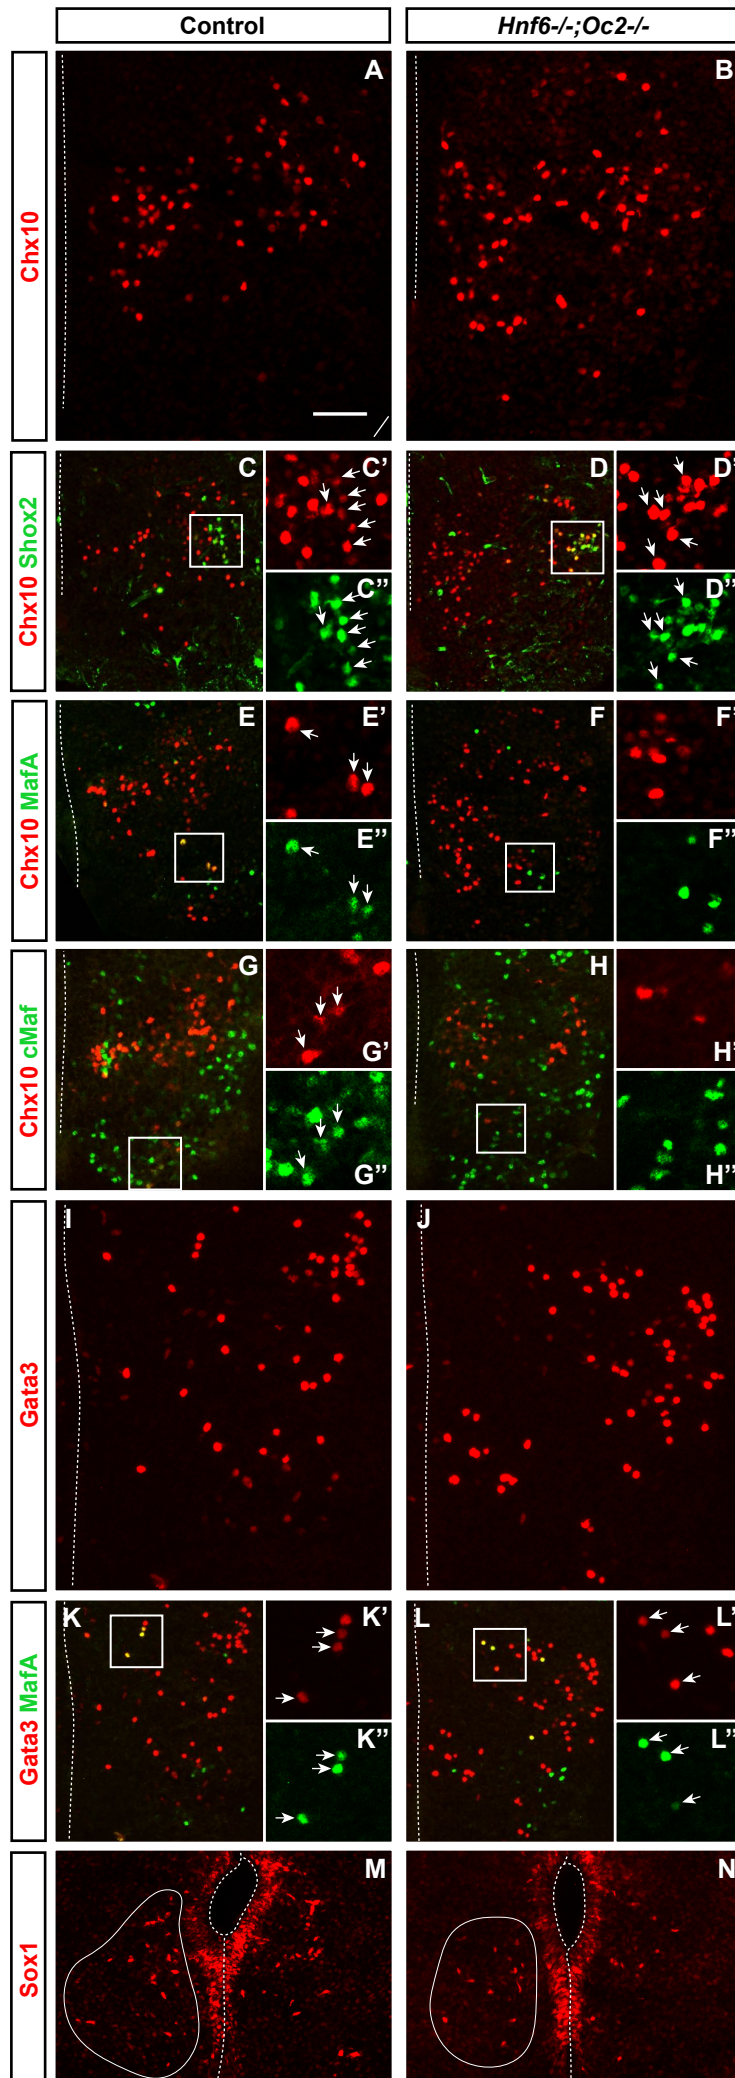

Harris A. et al., Supplementary figure 1

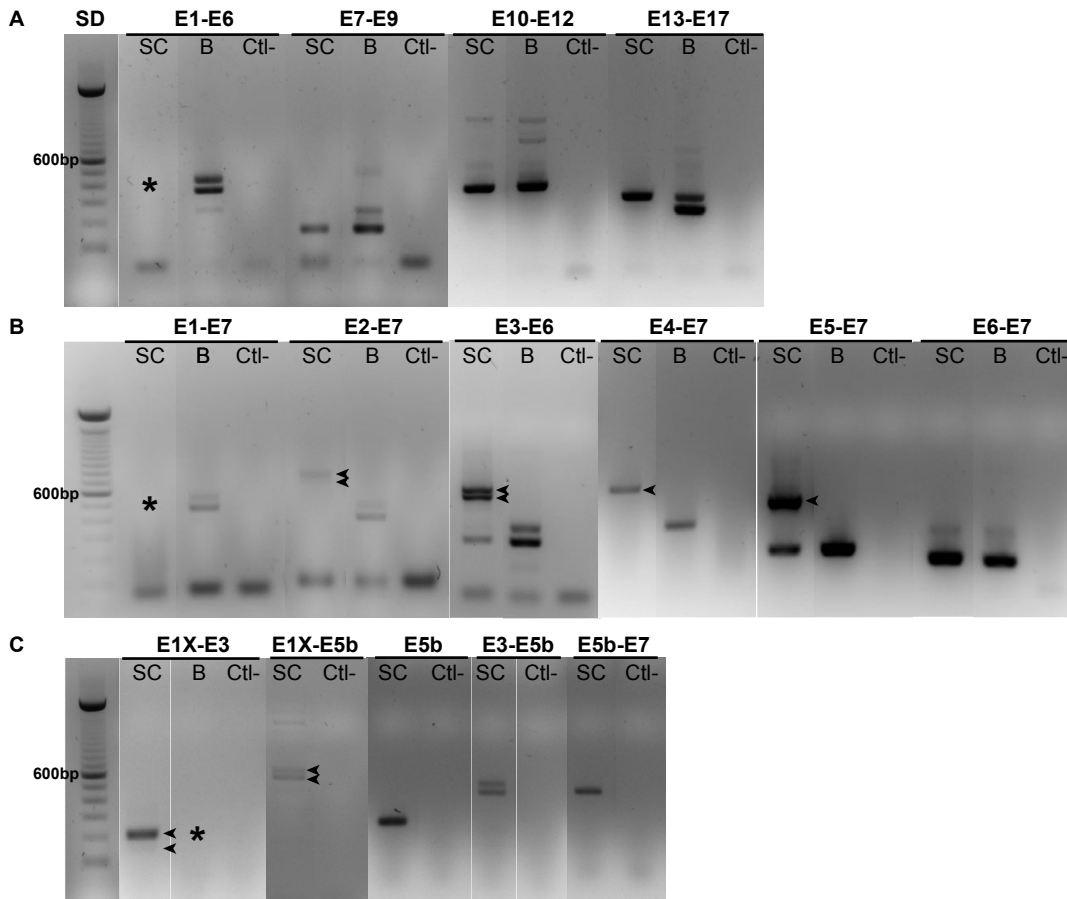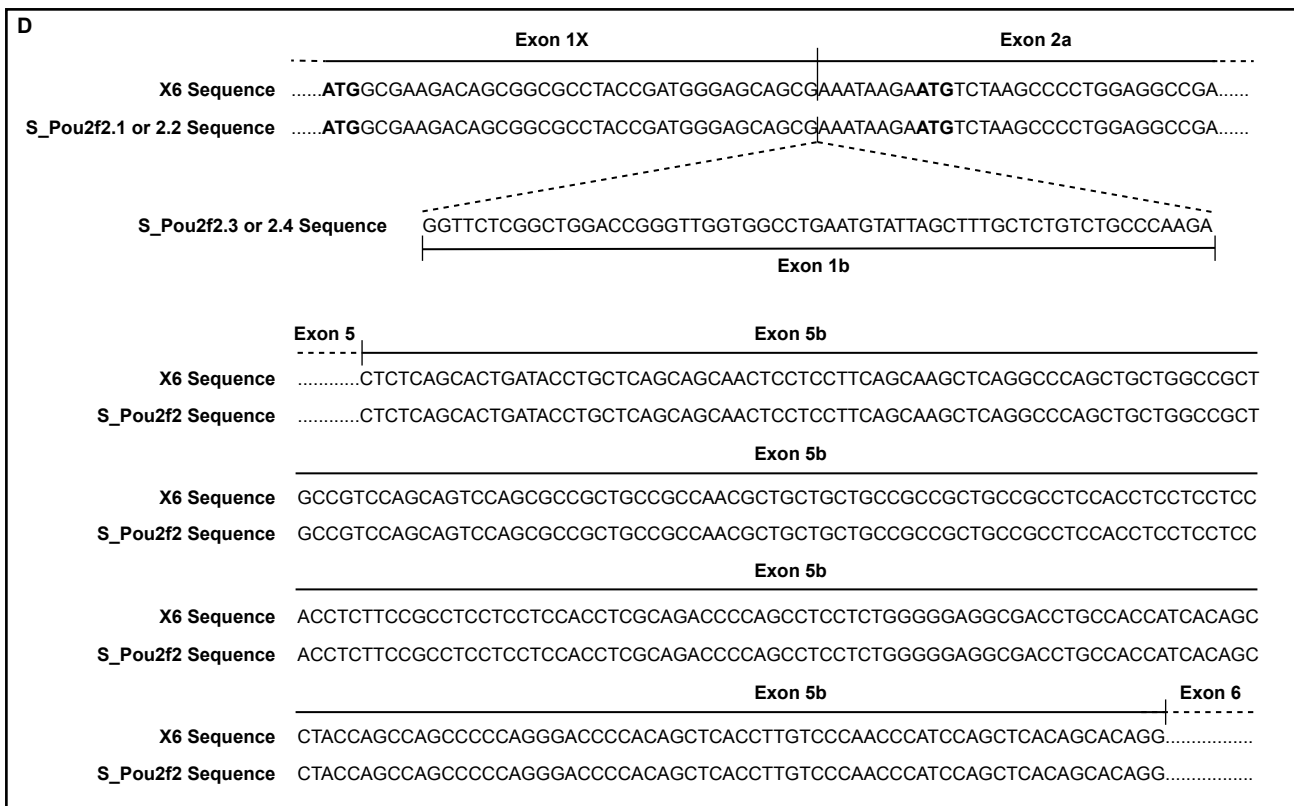

Harris et al., Supplementary figure 2

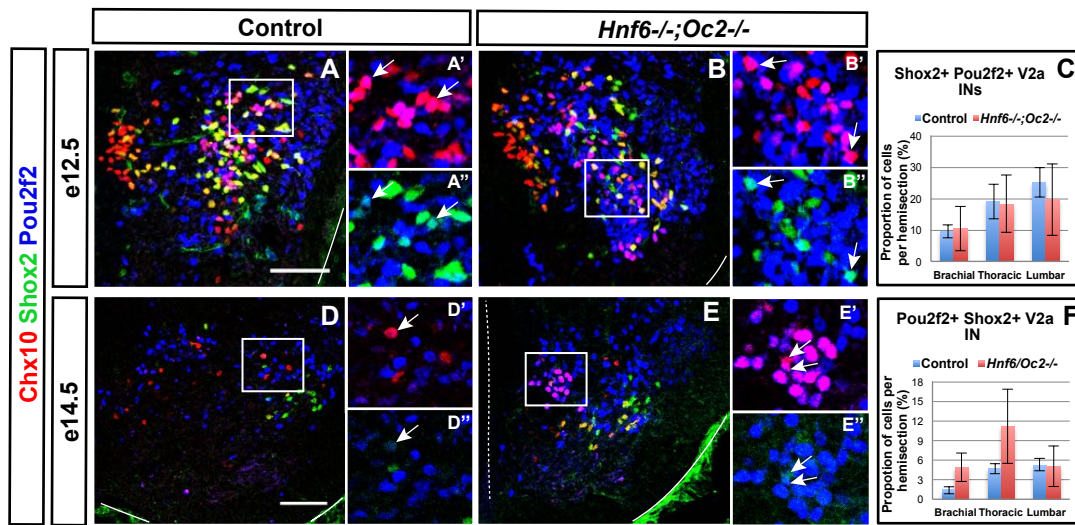

Harris A. et al, Supplementary figure 3

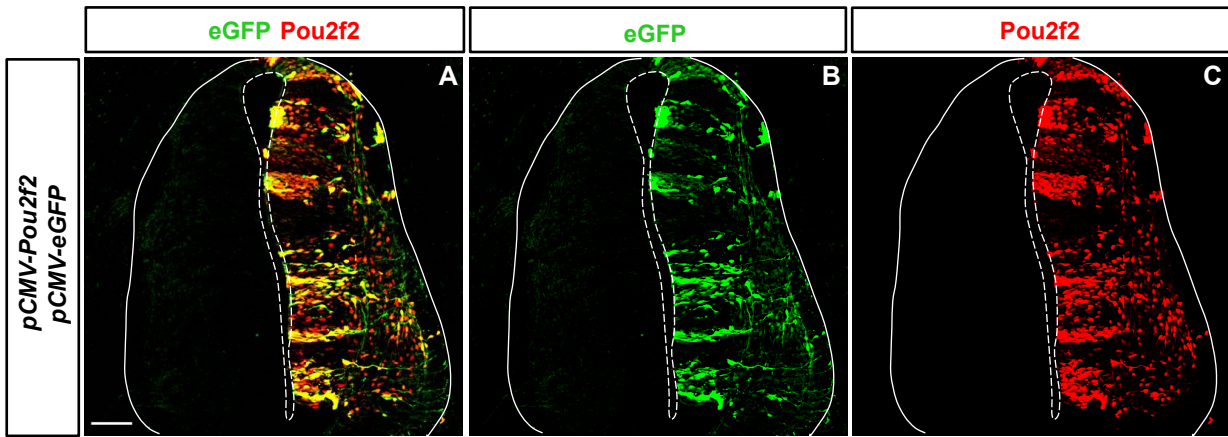

Harris A. et al, supplementary figure 4



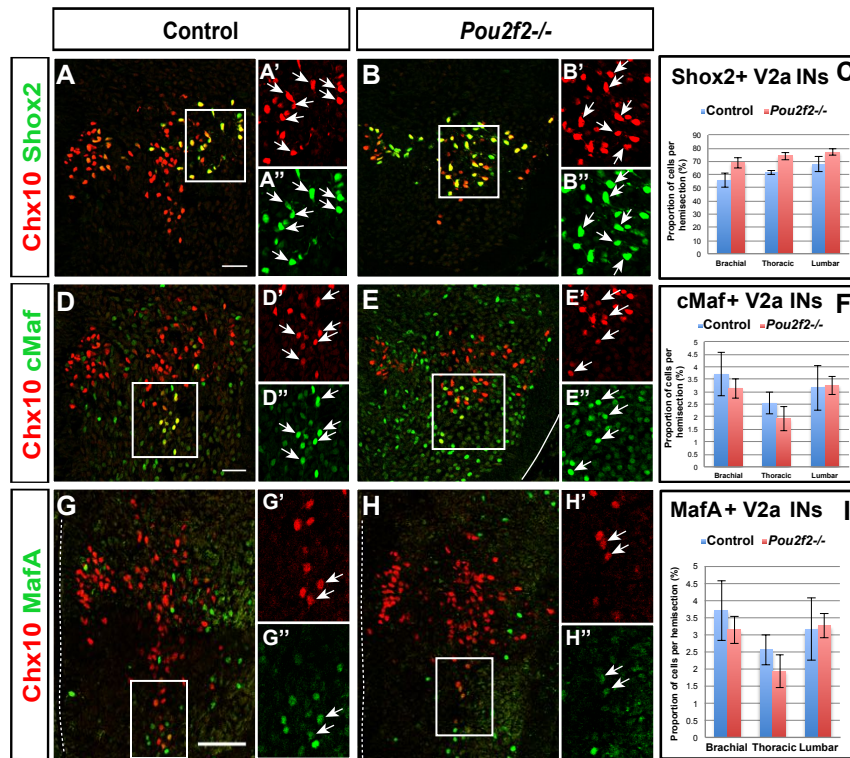

Harris A. et al, Supplementary figure 5

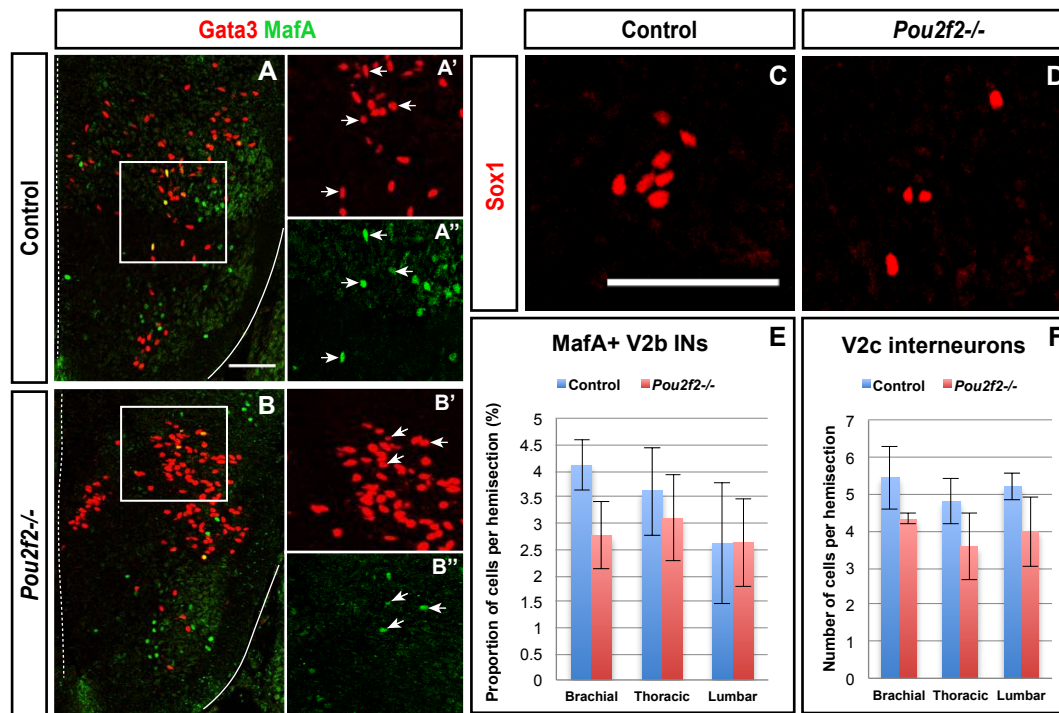

Harris A. et al., Supplementary figure 6
